# Supplementary material for: Polyclonal expansion of functional tumor-reactive lymphocyte infiltrating glioblastoma for personalized cell therapy
Source: Research Square preprint supplement (doi:10.21203/rs.3.rs-6080471/v1), 2025-03-05
Supplement: Supplementary file 1 [file 9fd18462eecfa7b8853ea618.docx]

**Table S1. Characteristics of patients**

| **TIL-ID** | **diagnosis** | **age at surgery** | **gender** | **IDH status** | **MGMT (Met≥0.1)** | **steroid treatment** | **DEX mg** | **duration** |
| --- | --- | --- | --- | --- | --- | --- | --- | --- |
| TIL 240 | glioblastoma | 53 | M | WT | NMET (0.01) | Y | 4 | 32 |
| TIL 247 | recurrent glioblastoma | 37 | M | WT | NMET (0,03) | N |  |  |
| TIL 254 | recurrent glioblastoma | 55 | M | WT | MET (2,85) | N |  |  |
| TIL 262 | glioblastoma | 56 | F | WT | MET (0,11) | Y | 4 | 33 |
| TIL 264 | glioblastoma | 43 | M | WT | NMET (0,00) | Y | 8 | 47 |
| TIL 265 | astrocytoma IDHmut/G4 | 38 | M | MUT | MET (0,59) | N |  |  |
| TIL 266 | gliosarcoma | 76 | M | WT | NMET (0,00) | Y | 8 | 11 |
| TIL 268 | gliosarcoma | 75 | M | WT | MET (1,10) | Y | 8 | 16 |
| TIL 269 | glioblastoma | 44 | M | WT | NMET (0,00) | N |  |  |
| TIL 270 | glioblastoma | 51 | M | WT | MET (3,89) | N |  |  |
| TIL 271 | Oligodendroglioma IDHmut /G2 | 57 | M | MUT | MET (4,43) | Y | 4 | 53 |
| TIL 273 | glioblastoma | 56 | M | WT | MET (0,37) | Y | 4 | 44 |
| TIL 274 | recurrent glioblastoma | 56 | F | WT | MET (1.36) | N |  |  |
| TIL 275 | recurrent glioblastoma | 44 | F | WT | NMET (0,01) | N |  |  |
| TIL 276 | giant cell glioblastoma | 62 | M | WT | NMET (0,02) | Y | 8 | 31 |
| TIL 277 | epithelioid glioblastoma | 62 | M | WT | MET (1,42) | Y | 4 | 21 |
| TIL 278 | Oligodendroglioma IDHmut /G2 | 36 | M | MUT | MET (0,14) | Y | 4 | 25 |
| TIL 279 | glioblastoma | 61 | M | WT | NMET (0,03) | N |  |  |
| TIL 280 | glioblastoma | 51 | M | WT | NMET (0,00) | Y | 4 | 44 |
| TIL 281 | glioblastoma | 58 | M | WT | NMET (0,01) | Y | 4 | 25 |
| TIL 282 | glioblastoma | 62 | F | WT | NMET (0,01) | Y | 4 | 63 |
| TIL 283 | giant cell glioblastoma | 47 | M | WT | NMET (0,01) | N |  |  |
| TIL 284 | small cell glioblastoma | 68 | M | WT | MET (4,01) | Y | 4 | 34 |
| TIL 285 | recurrent glioblastoma | 47 | F | WT | NMET (0,03) | N |  |  |
| TIL 286 | glioblastoma | 56 | F | WT | NMET (0,01) | Y | 4 | 47 |
| TIL 287 | glioblastoma | 74 | M | WT | MET (2,10) | Y | 4 | 35 |
| TIL 288 | glioblastoma | 62 | M | WT | NMET (0,03) | Y | 3.2 | 59 |
| TIL 289 | glioblastoma | 56 | F | WT | NMET (0,00) | Y | 4 | 42 |
| TIL 293 | glioblastoma | 77 | M | WT | NMET (0,01) | Y | 8 | 57 |
| TIL 294 | glioblastoma | 54 | M | WT | NMET (0,00) | Y | 8 | 16 |
| TIL 295 | astrocytoma IDHmut/G4 | 52 | M | MUT | MET (2,46) | N |  |  |
| TIL 296 | glioblastoma | 64 | F | WT | NMET (0,00) | N |  |  |
| TIL 297 | glioblastoma | 71 | M | WT | NMET (0,01) | Y | 4 | 45 |
| TIL 298 | glioblastoma | 76 | F | WT | NMET (0,02) | Y | 8 | 37 |
| TIL 299 | recurrent glioblastoma | 59 | M | WT | NMET (0,00) | N |  |  |
| TIL 300 | astrocytoma IDHmut/G3 | 58 | F | MUT | MET (1,92) | Y | 4 | 111 |
| TIL 301 | glioblastoma | 77 | M | WT | NMET (0,01) | Y | 8 | 17 |
| TIL 302 | recurrent glioblastoma | 55 | F | WT | NMET (0,02) | N |  |  |
| TIL 303 | astrocytoma IDHmut/G2 | 64 | M | MUT | MET (0,75) | N |  |  |
| TIL 304 | recurrent glioblastoma | 76 | F | WT | MET (2,48) | N |  |  |
| TIL 305 | glioblastoma | 51 | F | WT | NMET (0,00) | Y | 4 | 3 |
| TIL 307 | glioblastoma | 77 | F | WT | NMET (0,00) | Y | 8 | 47 |
| TIL 308 | glioblastoma | 71 | M | WT | NMET (0,01) | Y | 6 | 68 |
| TIL 309 | recurrent glioblastoma | 77 | M | WT | MET (2,84) | N |  |  |
| TIL 310 | recurrent glioblastoma | 54 | M | WT | NMET (0,00) | Y | 2 | 39 |
| TIL 311 | glioblastoma | 63 | M | WT | NMET (0,00) | N |  |  |
| TIL 312 | glioblastoma | 61 | M | WT | NMET (0,00) | Y | 16 | 33 |
| TIL 313 | glioblastoma | 44 | F | WT | NMET (0,00) | Y | 8 | 91 |
| TIL 314 | glioblastoma | 55 | M | WT | NMET (0,00) | Y | 8 | 75 |
| TIL 315 | astrocytoma IDHmut/G4 | 41 | M | MUT | MET (0,50) | Y | 8 | 30 |
| TIL 316 | oligodendroglioma IDH-mut/G3 | 74 | F | MUT | MET (3,42) | N |  |  |
| TIL 317 | recurrent glioblastoma | 53 | M | WT | MET (0,41) | Y | 4 | 44 |
| TIL 318 | recurrent glioblastoma | 65 | F | WT | MET (4,10) | N |  |  |
| TIL 319 | glioblastoma | 49 | F | WT | NMET (0,00) | Y | 4 | 32 |
| TIL 320 | oligodendroglioma IDH-mut/G3 | 53 | F | MUT | MET (4,71) | Y | 4 | 37 |
| TIL 321 | glioblastoma | 64 | M | WT | MET (4,92) | Y | 4 | 22 |
| TIL 322 | glioblastoma | 76 | M | WT | MET (0,5) | Y | 4 | 32 |
| TIL 323 | oligodendroglioma IDH-mut/G3 | 30 | M | MUT | MET (1,00) | Y | 6 | 11 |
| TIL 324 | glioblastoma | 45 | M | WT | NMET (0,00) | N |  |  |
| TIL 325 | glioblastoma | 57 | M | WT | MET (0,60) | Y | 4 | 30 |
| TIL 326 | oligodendroglioma IDH-mut/G3 | 24 | M | MUT | MET (0,36) | N |  |  |
| TIL 327 | astrocytoma IDHmut/G3 | 35 | F | MUT | MET (0,59) | Y | 2 | 52 |
| TIL 328 | glioblastoma | 78 | M | WT | NMET (0,00) | Y | 4 | 28 |
| TIL 330 | gliosarcoma | 56 | M | WT | NMET (0,00) | Y | 4 | 54 |
| TIL 331 | gliosarcoma | 52 | F | WT | NMET (0,00) | Y | 8 | 33 |
| TIL 333 | glioblastoma | 70 | M | WT | NMET (0,00) | Y | 8 | 32 |
| TIL 334 | glioblastoma | 58 | M | WT | NMET (0,00) | Y | 8 | 43 |
| TIL 335 | glioblastoma | 50 | M | WT | NMET (0,00) | Y | 12 | 3 |
| TIL 336 | recurrent glioblastoma | 76 | F | WT | MET (2,71) | N |  |  |
| TIL 337 | glioblastoma | 56 | M | WT | MET (2,06) | Y | 16 | 29 |
| TIL 338 | recurrent glioblastoma | 51 | M | WT | MET (2,66) | N |  |  |
| TIL 339 | glioblastoma | 57 | M | WT | MET (1,62) | Y | 4 | 55 |
| TIL 340 | glioblastoma | 73 | M | WT | NMET (0,00) | N |  |  |
| TIL341 | recurrent glioblastoma | 51 | M | WT | NMET (0,00) | Y | 4 | 4 |
| TIL 342 | giant cell glioblastoma | 64 | F | WT | NMET (0,00) | Y | 4 | 8 |
| TIL 343 | glioblastoma | 63 | F | WT | NMET (0,00) | Y | 8 | 29 |
| TIL 344 | glioblastoma | 49 | M | WT | NMET (0,00) | Y | 2 | 31 |
| TIL 346 | glioblastoma | 63 | M | WT | NMET (0,01) | Y | 4 | 43 |
| TIL 348 | glioblastoma | 61 | M | WT | NMET (0,06) | Y | 12 | 37 |
| TIL 349 | recurrent glioblastoma | 62 | F | WT | MET (0,22) | N |  |  |
| TIL 350 | glioblastoma | 68 | M | WT | NMET (0,05) | Y | 4 | 34 |
| TIL 351 | glioblastoma | 49 | M | WT | MET (1,14) | N |  |  |
| TIL 352 | glioblastoma | 59 | M | WT | NMET (0,06) | Y | 8 | 80 |
| TIL 353 | glioblastoma | 75 | M | WT | NMET (0,00) | Y | 8 | 44 |
| TIL 354 | glioblastoma | 51 | F | WT | NMET (0,02) | Y | 8 | 22 |
| TIL 356 | glioblastoma | 67 | M | WT | MET (3,13) | Y | 8 | 81 |
| TIL 358 | glioblastoma | 49 | M | WT | NMET (0,01) | N |  |  |
| TIL 359 | recurrent glioblastoma | 57 | M | WT | NMET (0,04) | N |  |  |
| TIL 360 | giant cell glioblastoma | 32 | F | WT | NMET (0,01) | Y | 16 | 4 |
| TIL 361 | astrocytoma IDHmut/G3 | 38 | M | MUT | NMET (0,04) | N |  |  |
| TIL 362 | glioblastoma | 47 | M | WT | NMET (0,03) | Y | 8 | 18 |
| TIL 363 | glioblastoma | 71 | F | WT | NMET (0.02) | Y | 8 | 30 |
| TIL 364 | glioblastoma | 49 | F | WT | NMET (0,00) | Y | 4 | 104 |
| TIL 365 | glioblastoma | 67 | F | WT | MET (2,69) | Y | 4 | 28 |
| TIL 366 | glioblastoma | 69 | M | WT | NMET (0,04) | Y | 5 | 40 |
| TIL 367 | recurrent glioblastoma | 61 | M | WT | MET (0,15)) | Y | 8 | 5 |
| TIL 368 | glioblastoma | 71 | M | WT | NMET (0,03) | Y | 4 | 14 |
| TIL 369 | glioblastoma | 61 | M | WT | MET (3,66) | Y | 8 | 47 |
| TIL 370 | recurrent glioblastoma | 45 | M | WT | NMET (0,03) | N |  |  |
| TIL 371 | glioblastoma | 76 | M | WT | NMET (0,04) | N |  |  |
| TIL 372 | giant cell glioblastoma | 64 | M | WT | NMET (0,06) | Y | 4 | 21 |
| TIL 373 | glioblastoma | 47 | M | WT | MET (2,98) | N |  |  |
| TIL 374 | glioblastoma | 68 | F | WT | MET (3,06) | N |  |  |
| TIL 377 | glioblastoma | 63 | M | WT | NMET (0,00) | Y | 8 | 41 |
| TIL 378 | recurrent glioblastoma | 43 | M | WT | NMET (0,02) | Y | 8 | 9 |
| TIL 379 | glioblastoma | 58 | M | WT | MET (0,75) | Y | 16 | 12 |
| TIL 381 | glioblastoma | 59 | M | WT | NMET (0,03) | Y | 8 | 31 |
| TIL 382 | glioblastoma | 58 | F | WT | MET (3.33) | Y | 8 | 29 |
| TIL 383 | astrocytoma IDHmut/G4 | 64 | M | MUT | NMET (0.04) | N |  |  |
| TIL 384 | glioblastoma | 65 | M | WT | NMET (0.02) | Y | 8 | 21 |
| TIL 385 | glioblastoma | 75 | M | WT | NMET (0.02) | Y | 8 | 21 |
| TIL 386 | glioblastoma | 56 | M | WT | MET (1.95) | Y | 2 | 36 |
| TIL 388 | astrocytoma IDHmut/G3 | 32 | F | MUT | MET (1,89) | N |  |  |
| TIL 389 | glioblastoma | 64 | M | WT | NMET (0,00) | N |  |  |
| TIL 390 | glioblastoma | 76 | M | WT | MET (0,31) | Y | 4 | 81 |
| TIL 391 | glioblastoma | 71 | F | WT | NMET (0,01) | Y | 9.375 | 21 |
| TIL 392 | glioblastoma | 62 | M | WT | NMET (0,3) | Y | 8 | 45 |
| TIL 393 | glioblastoma | 61 | M | WT | NMET (0,2) | N |  |  |
| TIL 394 | glioblastoma | 55 | M | WT | NMET (0,0) | Y | 4 | 46 |
| TIL 395 | glioblastoma | 70 | F | WT | NMET | Y | 8 | 37 |
| TIL 396 | glioblastoma | 49 | M | WT | NMET (0,02) | Y | 8 | 46 |
| TIL 397 | glioblastoma | 77 | M | WT | NMET | Y | 2 | 141 |
| TIL 398 | glioblastoma | 75 | M | WT | MET | Y | 16 | 32 |
| TIL 399 | glioblastoma | 57 | F | WT | MET | Y | 4 | 19 |
| TIL 400 | recurrent glioblastoma | 60 | M | WT | NMET | Y | 8 | 1 |
| TIL 401 | glioblastoma | 62 | M | WT | NMET | Y | 12 | 1 |
| TIL 402 | recurrent glioblastoma | 42 | F | MUT | NMET | Y | 8 | 34 |
| TIL 403 | glioblastoma | 57 | M | WT | NMET | Y | 8 | 50 |
| TIL 404 | glioblastoma | 74 | F | WT | NMET | Y | 4 | 14 |
| TIL 405 | glioblastoma | 71 | M | WT | MET (2,71) | Y | 12 | 40 |
| TIL 406 | glioblastoma | 59 | F | WT | NMET (0,03) | Y | 8 | 28 |
| TIL 407 | astrocytoma IDHmut/G4 | 49 | M | MUT | NMET (0,03) | N |  |  |
| TIL 408 | glioblastoma | 74 | F | WT | NMET (0,03) | Y | 4 | 18 |
| TIL 409 | glioblastoma | 69 | F | WT | MET (8,85) | N |  |  |
| TIL 410 | glioblastoma | 70 | M | WT | MET (5,9) | Y | 2 | 40 |
| TIL 411 | recurrent glioblastoma | 65 | M | WT | NMET (0,02) | N |  |  |
| TIL 412 | astrocytoma IDHmut/G3 | 34 | F | MUT | NMET (0,02) | N |  |  |
| TIL 413 | glioblastoma | 76 | M | WT | MET (8,66) | Y | 4 | 44 |
| TIL 414 | glioblastoma | 48 | M | WT | NMET (0,00) | Y | 1.875 | 46 |
| TIL 415 | recurrent glioblastoma | 51 | M | WT | NMET (0,04) | Y | 4 | 28 |
| TIL 416 | glioblastoma | 65 | M | WT | NMET (0,01) | Y | 4 | 84 |
| TIL 417 | astrocytoma IDHmut/G3 | 45 | F | MUT | NMET (0,02) | Y | 8 | 76 |
| TIL 418 | recurrent glioblastoma | 59 | M | WT | MET (2,88) | Y | 6 | 82 |
| TIL 419 | glioblastoma | 69 | M | WT | NMET (0,02) | Y | 4 | 22 |
| TIL 420 | recurrent glioblastoma | 53 | M | WT | MET (3,12) | Y | 3.75 | 35 |
| TIL 421 | giant cell glioblastoma | 61 | F | WT | NMET (0,02) | Y | 4 | 18 |
| TIL 422 | glioblastoma | 60 | F | WT | NMET (0,01) | Y | 4 | 23 |
| TIL 423 | astrocytoma IDHmut/G3 | 46 | F | MUT | MET (0,76) | N |  |  |
| TIL 424 | astrocytoma IDHmut/G3 | 48 | M | MUT | MET (0,22) | Y | 2 | 24 |
| TIL 425 | recurrent glioblastoma | 70 | M | WT | NMET (0,07) | N |  |  |
| TIL 426 | recurrent glioblastoma IDH mut G3 | 39 | M | MUT | MET (0,94) | N |  |  |
| TIL 427 | glioblastoma | 49 | M | WT | NMET (0,00) | Y | 6 | 37 |
| TIL 428 | glioblastoma | 65 | F | WT | MET (3,21) | Y | 8 | 39 |
| TIL 429 | glioblastoma | 61 | M | WT | NMET (0,00) | Y | 8 | 40 |
| TIL 430 | recurrent glioblastoma | 50 | M | WT | MET (3,22) | Y | 6 | 45 |
| TIL 431 | recurrent glioblastoma IDH mut G4 | 43 | M | MUT | MET (2,27) | Y | 8 | 38 |
| TIL 432 | glioblastoma | 54 | M | WT | MET (0,23) | Y | 16 | 19 |
| TIL 433 | glioblastoma | 77 | M | WT | NMET (0,02) | Y | 4 | 16 |
| TIL 434 | glioblastoma | 75 | M | WT | NMET (0,06) | N |  |  |
| TIL 435 | recurrent glioblastoma IDH mut G4 | 50 | M | WT | NMET (0,00) | Y | 1 | 19 |
| TIL 436 | glioblastoma | 66 | M | WT | MET (2,41) | Y | 4 | 38 |

Abbreviations: IDH = Isocitrate dehydrogenase; MGMT = O[6]-methylguanine-DNA methyltransferase; G = grade; WT= wild-type; MUT = mutant; M = methylated; U = unmethylated; DEX: dexamethasone. In red not expanded tr-TILs. Highlighted light blue IDH1 mutant samples.

**Table S2. Recovery of immune cells from CUSA material**

|  | **Pre-CD137 enrichment** | **Post CD137**  **enrichment** | **Pre-CD137 enrichment** | **Post CD137 enrichment** | **Pre-CD137 enrichment** | **Post CD137 enrichment** |
| --- | --- | --- | --- | --- | --- | --- |
| **TIL** | **number of cells (X106)** | | **%CD45 bight** | | **% CD137+ (on CD45bight CD3+)** | |
| TIL 240 | 6.1 | 0.2 | 16.3 | 5.7 | 33.2 | 79.6 |
| TIL 247 | 12.5 | 0.6 | 13.2 | 6.6 | 42.1 | 81.3 |
| TIL 254 | 15.3 | 0.9 | 10.3 | 6.1 | 41.7 | 79.8 |
| TIL 262 | 3.3 | 0.2 | 3.2 | 8.2 | 46.0 | 85.2 |
| TIL 264 | 7.2 | 0.2 | 17.2 | 7.9 | 43.2 | 68.4 |
| TIL 265 | 10.1 | 0.2 | 12.7 | 3.7 | 46.6 | 75.7 |
| TIL 266 | 2.9 | 0.2 | 11.6 | 8.7 | 38.1 | 82.3 |
| TIL 268 | 11.2 | 0.5 | 22.3 | 5.6 | 33.2 | 78.1 |
| TIL 269 | 5.5 | 0.3 | 7.6 | 3.2 | 46.3 | 68.5 |
| TIL 270 | 5.2 | 0.2 | 20.8 | 11.8 | 28.6 | 82.7 |
| TIL 271 | 2.0 | 0.2 | 35.6 | 1.8 | 30.5 | 65.4 |
| TIL 273 | 6.2 | 0.8 | 55.5 | 25.5 | 20.5 | 73.4 |
| TIL 274 | 9.9 | 0.2 | 60.5 | 39.7 | 37.8 | 82.1 |
| TIL 275 | 5.9 | 0.2 | 46.3 | 24.7 | 47.6 | 88.7 |
| TIL 276 | 1.6 | 0.1 | 7.8 | 1.7 | 40.0 | 77.8 |
| TIL 277 | 1.8 | 0.5 | 11.7 | 17.6 | 47.6 | 77.5 |
| TIL 278 | 1.2 | 2.5 | 6.5 | 5.2 | 20.5 | 78.1 |
| TIL 279 | 4.7 | 0.4 | 15.5 | 6.6 | 33.0 | 76.7 |
| TIL 280 | 1.1 | 0.2 | 32.9 | 7.7 | 29.6 | 95.5 |
| TIL 281 | 2.5 | 0.1 | 5.3 | 2.5 | 29.7 | 40.0 |
| TIL 282 | 4.3 | 0.1 | 18.2 | 2.3 | 33.8 | 46.3 |
| TIL 283 | 3.1 | 0.1 | 49.8 | 11.2 | 43.9 | 81.7 |
| TIL 284 | 2.7 | 0.1 | 18.1 | 1.9 | 34.7 | 55.9 |
| TIL 285 | 1.9 | 0.2 | 16.6 | 5.8 | 40.3 | 62.1 |
| TIL 286 | 4.1 | 0.1 | 30.2 | 1.5 | 48.4 | 60.0 |
| TIL 287 | 1.5 | 0.7 | 54.6 | 30.9 | 42.7 | 83.8 |
| TIL 288 | 6.0 | 0.1 | 22.9 | 1.1 | 39.7 | 68.3 |
| TIL 289 | 9.3 | 0.8 | 45.6 | 1.4 | 39.5 | 61.9 |
| TIL 293 | 1.3 | 0.2 | 14.8 | 1.3 | 40.2 | 75.2 |
| TIL 294 | 1.0 | 0.3 | 30.9 | 29.6 | 48.9 | 78.3 |
| TIL 295 | 3.7 | 0.1 | 22.3 | 2.5 | 37.9 | 58.6 |
| TIL 296 | 1.1 | 0.5 | 40.4 | 8.5 | 31.1 | 68.8 |
| TIL 297 | 3.3 | 0.1 | 32.6 | 6.7 | 41.8 | 54.4 |
| TIL 298 | 4.1 | 0.1 | 22.5 | 18.9 | 33.6 | 69.0 |
| TIL 299 | 4.5 | 0.1 | 41.9 | 6.3 | 45.8 | 61.9 |
| TIL 300 | 1.3 | 0.2 | 40.5 | 2.9 | 51.3 | 63.0 |
| TIL 301 | 8.2 | 0.2 | 38.3 | 11.5 | 58.5 | 74.3 |
| TIL 302 | 2.0 | 0.1 | 44.3 | 14.7 | 47.5 | 92.5 |
| TIL 303 | 5.4 | 0.1 | 32.7 | 2.6 | 34.1 | 68.2 |
| TIL 304 | 6.5 | 0.1 | 38.9 | 26.6 | 20.4 | 88.3 |
| TIL 305 | 9.0 | 0.3 | 26.0 | 2.7 | 50.1 | 77.3 |
| TIL 307 | 8.7 | 0.2 | 31.1 | 3.3 | 43.0 | 80.7 |
| TIL 308 | 4.2 | 0.1 | 7.3 | 1.3 | 39.0 | 71.8 |
| TIL 309 | 6.1 | 0.1 | 40.9 | 17.2 | 54.9 | 77.8 |
| TIL 310 | 1.1 | 0.1 | 34.2 | 5.6 | 48.3 | 72.7 |
| TIL 311 | 9.1 | 0.1 | 38.3 | 22.3 | 60.4 | 78.3 |
| TIL 312 | 3.7 | 0.1 | 22.3 | 4.7 | 52.2 | 63.2 |
| TIL 313 | 2.8 | 0.1 | 38.6 | 20.1 | 59.3 | 80.4 |
| TIL 314 | 3.0 | 0.1 | 23.0 | 13.0 | 54.0 | 71.5 |
| TIL 315 | 7.6 | 0.1 | 3.3 | 3.5 | 43.5 | 71.6 |
| TIL 316 | 2.6 | 0.1 | 32.1 | 10.4 | 35.8 | 69.2 |
| TIL 317 | 1.1 | 0.1 | 5.2 | 3.6 | 59.4 | 63.7 |
| TIL 318 | 2.4 | 0.2 | 8.4 | 2.2 | 47.7 | 67.7 |
| TIL 319 | 8.0 | 0.1 | 2.4 | 4.3 | 52.6 | 91.6 |
| TIL 320 | 2.8 | 0.1 | 7.5 | 4.9 | 48.5 | 36.0 |
| TIL 321 | 3.0 | 0.1 | 8.4 | 5.8 | 57.0 | 65.3 |
| TIL 322 | 8.0 | 0.4 | 2.8 | 1.8 | 37.3 | 76.0 |
| TIL 323 | 4.0 | 0.1 | 8.0 | 21.3 | 30.3 | 79.2 |
| TIL 324 | 1.0 | 0.1 | 6.6 | 10.4 | 24.1 | 72.3 |
| TIL 325 | 1.5 | 0.8 | 5.8 | 13.9 | 40.9 | 77.2 |
| TIL 326 | 2.0 | 0.3 | 7.3 | 2.0 | 13.5 | 82.1 |
| TIL 327 | 1.6 | 0.3 | 12.5 | 10.0 | 30.9 | 57.7 |
| TIL 328 | 3.9 | 0.3 | 7.3 | 10.8 | 19.5 | 70.8 |
| TIL 330 | 2.7 | 0.2 | 43.3 | 32.4 | 39.6 | 76.1 |
| TIL 331 | 1.8 | 0.1 | 12.5 | 5.9 | 37.6 | 70.1 |
| TIL 333 | 8.9 | 0.5 | 34.0 | 16.5 | 50.0 | 71.0 |
| TIL 334 | 1.1 | 0.4 | 52.8 | 31.6 | 32.4 | 75.8 |
| TIL 335 | 1.7 | 0.3 | 3.2 | 3.8 | 40.8 | 71.3 |
| TIL 336 | 3.1 | 0.3 | 3.9 | 9.5 | 37.1 | 80.0 |
| TIL 337 | 1.6 | 0.4 | 30.8 | 7.9 | 41.0 | 84.3 |
| TIL 338 | 2.5 | 0.6 | 10.0 | 19.9 | 28.2 | 61.6 |
| TIL 339 | 1.7 | 0.7 | 5.5 | 10.8 | 39.6 | 70.8 |
| TIL 340 | 8.8 | 0.2 | 23.3 | 9.8 | 32.1 | 70.6 |
| TIL341 | 2.6 | 0.1 | 8.4 | 8.7 | 38.4 | 72.0 |
| TIL 342 | 1.6 | 0.3 | 2.5 | 4.1 | 26.4 | 77.2 |
| TIL 343 | 2.6 | 0.2 | 3.9 | 16.1 | 47.5 | 74.0 |
| TIL 344 | 3.0 | 0.1 | 13.8 | 6.4 | 45.5 | 91.3 |
| TIL 346 | 1.7 | 0.5 | 13.8 | 6.4 | 46.3 | 74.6 |
| TIL 348 | 7.0 | 0.2 | 7.1 | 5.7 | 23.4 | 71.0 |
| TIL 349 | 1.8 | 0.1 | 8.6 | 15.2 | 38.5 | 88.5 |
| TIL 350 | 1.5 | 0.5 | 4.4 | 6.8 | 37.9 | 69.4 |
| TIL 351 | 1.0 | 0.1 | 7.3 | 5.8 | 41.3 | 74.9 |
| TIL 352 | 1.0 | 0.2 | 6.5 | 3.9 | 21.7 | 67.2 |
| TIL 353 | 3.7 | 0.2 | 14.6 | 5.6 | 30.8 | 60.2 |
| TIL 354 | 5.7 | 0.5 | 10.7 | 9.0 | 47.8 | 79.4 |
| TIL 356 | 1.3 | 1.0 | 15.0 | 21.4 | 52.1 | 70.8 |
| TIL 358 | 1.8 | 0.1 | 11.1 | 5.6 | 65.3 | 85.7 |
| TIL 359 | 6.0 | 0.1 | 39.0 | 31.2 | 45.3 | 85.0 |
| TIL 360 | 1.2 | 0.5 | 21.2 | 19.2 | 56.7 | 73.1 |
| TIL 361 | 1.2 | 0.1 | 12.3 | 8.2 | 62.3 | 68.3 |
| TIL 362 | 7.6 | 0.3 | 27.3 | 11.8 | 49.2 | 62.7 |
| TIL 363 | 1.6 | 0.5 | 17.9 | 16.3 | 44.4 | 61.8 |
| TIL 364 | 4.4 | 0.7 | 17.9 | 16.3 | 52.3 | 72.2 |
| TIL 365 | 1.0 | 0.1 | 12.5 | 12.7 | 31.2 | 68.5 |
| TIL 366 | 2.8 | 0.1 | 26.9 | 12.7 | 45.3 | 71.8 |
| TIL 367 | 6.5 | 0.1 | 16.3 | 7.0 | 40.7 | 75.8 |
| TIL 368 | 2.3 | 0.9 | 37.3 | 23.3 | 50.4 | 61.4 |
| TIL 369 | 1.8 | 0.3 | 13.9 | 4.4 | 46.5 | 72.2 |
| TIL 370 | 1.7 | 0.1 | 10.6 | 2.9 | 53.6 | 76.1 |
| TIL 371 | 5.4 | 0.2 | 46.1 | 23.3 | 38.3 | 74.1 |
| TIL 372 | 5.5 | 0.2 | 7.7 | 7.8 | 56.6 | 73.9 |
| TIL 373 | 2.3 | 0.3 | 40.9 | 17.2 | 56.5 | 74.1 |
| TIL 374 | 3.4 | 0.1 | 55.0 | 31.0 | 38.7 | 68.2 |
| TIL 377 | 6.3 | 0.3 | 57.4 | 30.5 | 40.4 | 65.4 |
| TIL 378 | 6.9 | 0.1 | 13.7 | 3.6 | 38.7 | 56.2 |
| TIL 379 | 1.4 | 0.2 | 62.0 | 30.3 | 39.2 | 59.3 |
| TIL 381 | 5.1 | 0.3 | 34.6 | 17.3 | 42.8 | 82.8 |
| TIL 382 | 5.9 | 0.2 | 12.0 | 4.8 | 41.6 | 57.7 |
| TIL 383 | 1.5 | 0.1 | 10.8 | 7.4 | 51.5 | 62.5 |
| TIL 384 | 8.0 | 0.2 | 11.6 | 6.5 | 38.8 | 56.7 |
| TIL 385 | 2.5 | 0.3 | 10.0 | 4.1 | 38.9 | 65.8 |
| TIL 386 | 2.0 | 0.1 | 23.4 | 8.5 | 43.1 | 72.9 |
| TIL 388 | 31.0 | 1.3 | 14.9 | 9.5 | 39.2 | 80.1 |
| TIL 389 | 16.0 | 0.5 | 14.9 | 2.1 | 45.7 | 86.6 |
| TIL 390 | 7.7 | 0.6 | 41.3 | 5.1 | 42.1 | 78.2 |
| TIL 391 | 6.9 | 0.1 | 17.2 | 10.2 | 56.9 | 68.1 |
| TIL 392 | 5.0 | 1.1 | 7.0 | 20.3 | 33.3 | 89.2 |
| TIL 393 | 6.5 | 0.2 | 7.9 | 6.9 | 56.7 | 76.9 |
| TIL 394 | 4.4 | 0.4 | 5.7 | 1.2 | 40.7 | 77.3 |
| TIL 395 | 8.8 | 0.3 | 16.4 | 3.3 | 39.6 | 82.6 |
| TIL 396 | 12.5 | 2.0 | 7.5 | 4.9 | 45.8 | 66.6 |
| TIL 397 | 13.0 | 0.7 | 11.4 | 9.6 | 50.7 | 85.3 |
| TIL 398 | 2.8 | 0.8 | 9.8 | 4.8 | 47.3 | 79.7 |
| TIL 399 | 16.2 | 1.1 | 8.3 | 3.5 | 51.3 | 72.9 |
| TIL 400 | 8.2 | 1.2 | 5.6 | 3.1 | 40.3 | 77.6 |
| TIL 401 | 8.8 | 0.1 | 13.2 | 4.0 | 39.8 | 80.1 |
| TIL 402 | 1.2 | 0.2 | 20.2 | 15.0 | 51.3 | 79.1 |
| TIL 403 | 7.6 | 0.9 | 40.4 | 24.1 | 47.0 | 75.6 |
| TIL 404 | 19.8 | 0.7 | 22.8 | 24.2 | 40.3 | 63.4 |
| TIL 405 | 10.0 | 0.6 | 33.8 | 19.7 | 57.1 | 76.9 |
| TIL 406 | 5.5 | 0.2 | 21.6 | 13.4 | 56.5 | 69.8 |
| TIL 407 | 7.1 | 0.4 | 19.9 | 9.9 | 52.0 | 72.8 |
| TIL 408 | 11.6 | 1.3 | 8.5 | 10.1 | 46.4 | 87.2 |
| TIL 409 | 7.6 | 0.6 | 13.9 | 9.1 | 37.5 | 77.1 |
| TIL 410 | 3.0 | 0.1 | 7.8 | 5.1 | 41.5 | 90.3 |
| TIL 411 | 20.3 | 2.0 | 10.3 | 6.7 | 40.9 | 88.2 |
| TIL 412 | 2.5 | 0.2 | 10.1 | 11.2 | 53.9 | 70.8 |
| TIL 413 | 2.5 | 0.2 | 10.1 | 11.2 | 53.9 | 70.8 |
| TIL 414 | 12.8 | 0.6 | 14.8 | 6.1 | 50.5 | 70.8 |
| TIL 415 | 7.0 | 0.2 | 11.3 | 8.1 | 45.8 | 69.5 |
| TIL 416 | 14.5 | 0.4 | 11.5 | 8.5 | 47.5 | 91.0 |
| TIL 417 | 40.8 | 1.0 | 7.9 | 0.5 | 51.2 | 70.7 |
| TIL 418 | 16.1 | 0.4 | 19.2 | 16.0 | 52.1 | 88.9 |
| TIL 419 | 15.3 | 0.7 | 37.1 | 23.8 | 55.5 | 71.5 |
| TIL 420 | 12.5 | 0.3 | 8.4 | 15.6 | 67.5 | 75.6 |
| TIL 421 | 14.8 | 1.2 | 11.4 | 9.1 | 58.7 | 88.8 |
| TIL 422 | 6.0 | 0.1 | 3.4 | 4.2 | 47.9 | 75.5 |
| TIL 423 | 14.4 | 0.3 | 4.4 | 2.9 | 49.2 | 61.7 |
| TIL 424 | 11.6 | 0.2 | 9.4 | 6.0 | 52.9 | 73.8 |
| TIL 425 | 9.9 | 0.9 | 8.6 | 5.6 | 45.2 | 88.2 |
| TIL 426 | 8.1 | 0.3 | 6.0 | 3.7 | 55.3 | 65.0 |
| TIL 427 | 3.1 | 0.1 | 28.4 | 11.4 | 59.9 | 74.9 |
| TIL 428 | 8.2 | 0.5 | 15.5 | 10.0 | 63.5 | 69.0 |
| TIL 429 | 15.3 | 0.4 | 25.0 | 19.7 | 53.2 | 75.6 |
| TIL 430 | 15.2 | 0.3 | 23.4 | 15.2 | 47.0 | 80.5 |
| TIL 431 | 16.0 | 0.6 | 30.9 | 9.3 | 39.7 | 87.3 |
| TIL 432 | 9.2 | 0.2 | 8.9 | 8.4 | 48.2 | 73.6 |
| TIL 433 | 6.3 | 1.3 | 18.2 | 9.1 | 41.3 | 80.2 |
| TIL 434 | 9.4 | 0.4 | 19.1 | 6.4 | 41.6 | 81.7 |
| TIL 435 | 4.0 | 0.2 | 39.6 | 23.9 | 52.8 | 84.2 |
| TIL 436 | 10.1 | 0.2 | 15.6 | 6.5 | 55.6 | 81.6 |

pre-enrichment: after removal of debris using debris removal solution; post-enrichment: after CD137 magnetic enrichment. M±SD: mean ±standard deviation; P value ns: not significant (Mann-Withney test). In red not expanded tr-TILs. In blue tr-TIL samples subjected to in vitro functional molecular characterization. Highlighted light blue IDH1 mutant samples.

**Table S3. Characterization of T cell proportion and expansion ability**

|  | **Pre-CD137 enrichment %CD4** | **Post CD137 enrichment** | **End of culture** | **Pre-CD137 enrichment %CD8** | **Post CD137 enrichment** | **End of culture** | **Tr-TILs recovered** | **Expansion rate** |
| --- | --- | --- | --- | --- | --- | --- | --- | --- |
|  |  |  |  |
| **%CD4** | **CD4%** | **%CD8** | **CD8%** |
| **TIL #** |  | |  | |  | |  |  |
| TIL 240 | 27.7 | 41.8 | 74.4 | 47.1 | 35.3 | 20.3 | 1.70E+07 | 340.0 |
| TIL 247 | 43.2 | 36.4 | 2.9 | 36.7 | 53.4 | 94.8 | 7.00E+07 | 1400.0 |
| TIL 254 | 41.7 | 37.7 | 6.8 | 51.7 | 46.7 | 88.0 | 8.80E+07 | 1760.0 |
| TIL 262 | 42.7 | 32.4 | 1.8 | 41.2 | 36.9 | 91.8 | 6.30E+07 | 1260.0 |
| TIL 264 | 35.6 | 41.2 | 77.5 | 31.2 | 21.1 | 16.3 | 1.70E+06 | 34.0 |
| TIL 265 | 46.2 | 39.2 | 68.3 | 51.3 | 49.3 | 21.3 | 2.20E+06 | 44.0 |
| TIL 266 | 37.6 | 46.2 | 77.2 | 58.1 | 59.0 | 29.0 | 1.20E+06 | 24.0 |
| TIL 268 | 45.3 | 36.5 | 18.3 | 46.8 | 52.1 | 79.9 | 1.40E+06 | 28.0 |
| TIL 269 | 48.7 | 47.8 | 11.4 | 53.2 | 55.2 | 72.6 | 2.10E+07 | 420.0 |
| TIL 270 | 32.7 | 42.3 | 53.0 | 41.2 | 36.9 | 42.1 | 1.50E+07 | 300.0 |
| TIL 271 | 48.2 | 50.0 | 97.0 | 46.9 | 42.3 | 1.0 | 1.20E+06 | 24.0 |
| TIL 273 | 66.5 | 51.8 | 75.0 | 27.1 | 37.4 | 12.3 | 4.70E+07 | 940.0 |
| TIL 274 | 49.8 | 77.7 | 19.1 | 38.2 | 9.2 | 54.9 | 1.00E+07 | 200.0 |
| TIL 275 | 41.2 | 31.4 | 67.6 | 51.1 | 63.0 | 20.3 | 4.30E+07 | 860.0 |
| TIL 276 | 32.5 | 51.4 | 95.7 | 62.1 | 42.2 | 2.4 | 2.00E+05 | 4.0 |
| TIL 277 | 58.9 | 67.6 | 15.8 | 31.4 | 27.0 | 83.8 | 1.20E+07 | 240.0 |
| TIL 278 | 40.5 | 52.3 | 16.3 | 50.7 | 42.1 | 83.1 | 9.60E+05 | 19.2 |
| TIL 279 | 18.2 | 10.9 | 92.4 | 67.6 | 63.8 | 7.3 | 3.40E+08 | 6800.0 |
| TIL 280 | 39.1 | 32.6 | 22.3 | 56.4 | 62.2 | 77.5 | 1.10E+07 | 220.0 |
| TIL 281 | 34.1 | 35.7 | 78.3 | 51.6 | 41.3 | 20.9 | 1.00E+06 | 20.0 |
| TIL 282 | 43.8 | 15.0 | 99.5 | 42.4 | 43.3 | 0.4 | 6.00E+05 | 12.0 |
| TIL 283 | 43.5 | 78.2 | 99.8 | 52.6 | 16.7 | 0.1 | 2.90E+05 | 5.8 |
| TIL 284 | 52.7 | 62.6 | 99.7 | 42.0 | 26.5 | 0.3 | 1.50E+07 | 300.0 |
| TIL 285 | 30.5 | 31.3 | 13.2 | 61.2 | 56.3 | 86.2 | 2.20E+05 | 4.4 |
| TIL 286 | 46.8 | 38.1 | 99.5 | 47.5 | 45.2 | 0.1 | 8.40E+07 | 1680.0 |
| TIL 287 | 47.2 | 34.6 | 71.5 | 46.7 | 51.4 | 28.1 | 3.40E+07 | 680.0 |
| TIL 288 | 31.9 | 36.7 | 92.9 | 49.6 | 40.5 | 6.9 | 5.30E+05 | 10.6 |
| TIL 289 | 45.5 | 43.2 | 93.1 | 48.8 | 23.9 | 6.6 | 1.20E+06 | 24.0 |
| TIL 293 | 30.6 | 57.6 | 0.2 | 48.1 | 21.4 | 98.9 | 6.00E+06 | 120.0 |
| TIL 294 | 56.2 | 45.6 | 93.7 | 36.7 | 43.5 | 3.4 | 1.10E+08 | 2200.0 |
| TIL 295 | 28.6 | 25.8 | 1.8 | 56.1 | 51.6 | 82.6 | 4.90E+06 | 98.0 |
| TIL 296 | 45.0 | 40.9 | 45.0 | 46.1 | 52.3 | 54.7 | 9.00E+07 | 1800.0 |
| TIL 297 | 36.2 | 29.2 | 3.2 | 57.9 | 55.2 | 91.8 | 2.10E+06 | 42.0 |
| TIL 298 | 50.7 | 30.3 | 55.3 | 38.5 | 53.0 | 10.3 | 6.50E+05 | 13.0 |
| TIL 299 | 32.4 | 33.2 | 28.8 | 60.6 | 54.0 | 69.2 | 9.00E+05 | 18.0 |
| TIL 300 | 40.5 | 39.0 | 12.6 | 49.8 | 48.0 | 79.8 | 5.00E+04 | 1.0 |
| TIL 301 | 56.6 | 64.1 | 72.2 | 36.5 | 29.5 | 10.7 | 3.00E+05 | 6.0 |
| TIL 302 | 40.1 | 70.1 | 3.5 | 51.6 | 26.2 | 83.9 | 6.30E+06 | 126.0 |
| TIL 303 | 25.1 | 30.9 | 53.9 | 66.6 | 38.2 | 43.7 | 1.60E+07 | 320.0 |
| TIL 304 | 77.2 | 96.4 | 78.0 | 18.9 | 2.9 | 21.4 | 2.70E+06 | 54.0 |
| TIL 305 | 62.8 | 72.5 | 6.3 | 32.6 | 18.6 | 91.2 | 5.30E+05 | 10.6 |
| TIL 307 | 41.7 | 23.7 | 13.1 | 50.6 | 57.6 | 88.1 | 4.90E+05 | 9.8 |
| TIL 308 | 66.7 | 57.9 | 0.9 | 30.2 | 38.6 | 99.3 | 3.50E+05 | 7.0 |
| TIL 309 | 29.9 | 51.7 | 12.1 | 64.2 | 43.3 | 78.1 | 8.00E+05 | 16.0 |
| TIL 310 | 19.8 | 27.3 | 97.6 | 53.8 | 45.4 | 0.5 | 3.80E+05 | 7.6 |
| TIL 311 | 42.3 | 53.6 | 42.9 | 49.6 | 38.1 | 47.8 | 1.90E+07 | 380.0 |
| TIL 312 | 53.3 | 57.1 | 54.2 | 32.4 | 24.5 | 41.1 | 6.00E+05 | 12.0 |
| TIL 313 | 66.5 | 66.0 | 19.1 | 28.0 | 32.0 | 59.5 | 3.00E+05 | 6.0 |
| TIL 314 | 38.5 | 30.0 | 61.9 | 51.3 | 60.0 | 4.4 | 1.10E+06 | 22.0 |
| TIL 315 | 29.4 | 48.2 | 9.4 | 59.7 | 42.8 | 74.1 | 3.50E+05 | 7.0 |
| TIL 316 | 22.2 | 22.7 | 72.2 | 45.3 | 36.4 | 12.3 | 1.80E+06 | 36.0 |
| TIL 317 | 51.6 | 26.3 | 8.1 | 41.0 | 66.7 | 85.5 | 7.00E+05 | 14.0 |
| TIL 318 | 47.0 | 56.9 | 98.4 | 47.0 | 27.8 | 1.6 | 1.20E+07 | 240.0 |
| TIL 319 | 42.7 | 45.9 | 95.9 | 46.8 | 42.9 | 1.5 | 9.50E+07 | 1900.0 |
| TIL 320 | 29.2 | 35.7 | 47.4 | 51.3 | 57.1 | 62.8 | 3.80E+07 | 760.0 |
| TIL 321 | 38.2 | 40.8 | 90.5 | 57.2 | 57.1 | 9.5 | 7.00E+07 | 1400.0 |
| TIL 322 | 55.0 | 69.9 | 1.7 | 40.9 | 25.9 | 97.6 | 5.60E+07 | 1120.0 |
| TIL 323 | 32.9 | 27.3 | 97.8 | 60.5 | 65.8 | 20.7 | 3.80E+07 | 760.0 |
| TIL 324 | 41.5 | 41.2 | 57.1 | 51.8 | 56.6 | 32.7 | 7.20E+07 | 1440.0 |
| TIL 325 | 35.1 | 33.9 | 40.1 | 54.9 | 56.5 | 58.8 | 5.70E+07 | 1140.0 |
| TIL 326 | 43.1 | 20.3 | 70.1 | 48.2 | 65.6 | 27.8 | 1.80E+07 | 360.0 |
| TIL 327 | 48.4 | 43.1 | 85.4 | 44.5 | 51.4 | 3.8 | 4.10E+05 | 8.2 |
| TIL 328 | 50.1 | 41.8 | 25.2 | 43.5 | 49.8 | 67.9 | 3.80E+07 | 760.0 |
| TIL 330 | 24.0 | 26.4 | 32.6 | 67.3 | 62.9 | 64.5 | 2.50E+07 | 500.0 |
| TIL 331 | 66.1 | 50.0 | 37.0 | 31.6 | 38.3 | 61.5 | 6.00E+06 | 120.0 |
| TIL 333 | 39.6 | 44.6 | 4.8 | 48.9 | 47.3 | 91.2 | 3.50E+05 | 7.0 |
| TIL 334 | 35.7 | 47.8 | 24.0 | 61.4 | 44.0 | 73.5 | 4.00E+05 | 8.0 |
| TIL 335 | 36.3 | 59.2 | 2.1 | 58.9 | 37.4 | 93.8 | 6.00E+05 | 12.0 |
| TIL 336 | 47.1 | 50.0 | 92.1 | 45.3 | 37.5 | 4.2 | 3.00E+05 | 6.0 |
| TIL 337 | 37.2 | 60.3 | 22.6 | 59.6 | 38.4 | 79.8 | 6.00E+05 | 12.0 |
| TIL 338 | 34.7 | 35.4 | 53.4 | 57.3 | 56.5 | 42.5 | 2.40E+07 | 480.0 |
| TIL 339 | 38.6 | 36.7 | 0.7 | 55.6 | 57.1 | 99.2 | 1.10E+07 | 220.0 |
| TIL 340 | 34.6 | 42.4 | 45.7 | 58.6 | 54.1 | 50.6 | 1.90E+06 | 38.0 |
| TIL341 | 30.8 | 30.5 | 3.6 | 63.5 | 62.3 | 98.0 | 6.00E+05 | 12.0 |
| TIL 342 | 48.9 | 71.8 | 51.6 | 44.7 | 25.4 | 47.0 | 6.50E+07 | 1300.0 |
| TIL 343 | 44.7 | 42.9 | 14.3 | 49.5 | 54.2 | 82.7 | 1.70E+08 | 3400.0 |
| TIL 344 | 34.0 | 60.2 | 4.1 | 62.3 | 35.9 | 95.9 | 2.80E+07 | 560.0 |
| TIL 346 | 47.4 | 50.4 | 0.1 | 46.3 | 42.6 | 94.9 | 2.00E+07 | 400.0 |
| TIL 348 | 54.8 | 62.0 | 0.4 | 35.5 | 30.2 | 97.6 | 8.80E+07 | 1760.0 |
| TIL 349 | 30.1 | 64.4 | 0.0 | 66.8 | 32.2 | 100.0 | 4.00E+07 | 800.0 |
| TIL 350 | 39.6 | 66.4 | 79.5 | 55.4 | 30.2 | 19.6 | 3.00E+07 | 600.0 |
| TIL 351 | 13.3 | 27.8 | 7.3 | 76.1 | 59.2 | 88.2 | 2.60E+05 | 5.2 |
| TIL 352 | 62.8 | 53.9 | 7.7 | 31.0 | 49.6 | 88.9 | 1.20E+06 | 24.0 |
| TIL 353 | 29.7 | 21.4 | 2.2 | 70.3 | 37.9 | 98.4 | 9.00E+05 | 18.0 |
| TIL 354 | 48.5 | 64.2 | 44.1 | 45.3 | 28.4 | 38.9 | 1.70E+07 | 340.0 |
| TIL 356 | 27.3 | 40.6 | 98.1 | 68.0 | 44.8 | 0.8 | 5.30E+05 | 10.6 |
| TIL 358 | 33.9 | 34.3 | 99.4 | 59.0 | 54.0 | 0.1 | 2.30E+06 | 46.0 |
| TIL 359 | 48.4 | 70.0 | 12.1 | 44.8 | 26.2 | 85.2 | 3.70E+07 | 740.0 |
| TIL 360 | 37.8 | 69.2 | 0.1 | 60.3 | 27.6 | 98.3 | 4.40E+07 | 880.0 |
| TIL 361 | 18.0 | 4.9 | 0.7 | 78.7 | 68.3 | 99.3 | 7.00E+05 | 14.0 |
| TIL 362 | 48.0 | 47.5 | 93.7 | 43.8 | 40.8 | 0.3 | 3.10E+07 | 620.0 |
| TIL 363 | 29.0 | 29.3 | 99.0 | 61.2 | 61.7 | 0.8 | 4.50E+07 | 900.0 |
| TIL 364 | 65.3 | 60.5 | 88.5 | 35.7 | 38.3 | 3.2 | 2.50E+06 | 50.0 |
| TIL 365 | 36.1 | 43.5 | 11.6 | 61.9 | 56.0 | 86.8 | 1.10E+06 | 22.0 |
| TIL 366 | 31.5 | 31.1 | 0.3 | 56.7 | 55.3 | 99.1 | 2.20E+05 | 4.4 |
| TIL 367 | 26.2 | 27.3 | 73.2 | 68.8 | 60.6 | 0.4 | 6.00E+05 | 12.0 |
| TIL 368 | 28.3 | 28.5 | 46.8 | 69.0 | 59.9 | 50.4 | 2.40E+07 | 480.0 |
| TIL 369 | 20.2 | 23.5 | 11.5 | 75.2 | 73.1 | 74.0 | 2.00E+05 | 4.0 |
| TIL 370 | 64.4 | 89.6 | 64.3 | 29.9 | 8.2 | 24.8 | 1.60E+06 | 32.0 |
| TIL 371 | 50.2 | 70.4 | 0.3 | 360.0 | 7.4 | 99.6 | 6.00E+05 | 12.0 |
| TIL 372 | 39.6 | 42.4 | 1.3 | 55.7 | 49.4 | 98.7 | 2.80E+07 | 560.0 |
| TIL 373 | 43.6 | 47.1 | 46.4 | 51.0 | 44.5 | 51.9 | 4.20E+07 | 840.0 |
| TIL 374 | 42.0 | 51.6 | 28.9 | 55.6 | 45.7 | 69.6 | 1.00E+06 | 20.0 |
| TIL 377 | 18.3 | 19.0 | 94.1 | 75.7 | 69.3 | 2.2 | 1.20E+08 | 2400.0 |
| TIL 378 | 50.8 | 54.5 | 12.6 | 43.3 | 34.3 | 86.9 | 1.00E+07 | 200.0 |
| TIL 379 | 47.5 | 48.6 | 57.3 | 40.9 | 38.9 | 40.3 | 1.10E+08 | 2200.0 |
| TIL 381 | 35.2 | 49.2 | 7.9 | 56.3 | 39.2 | 63.0 | 3.10E+07 | 620.0 |
| TIL 382 | 31.4 | 19.0 | 98.8 | 58.4 | 62.6 | 0.0 | 3.10E+05 | 6.2 |
| TIL 383 | 35.8 | 50.6 | 21.8 | 56.0 | 28.7 | 61.5 | 3.60E+05 | 7.2 |
| TIL 384 | 34.7 | 49.0 | 93.9 | 32.7 | 37.7 | 3.9 | 1.00E+07 | 200.0 |
| TIL 385 | 19.5 | 14.5 | 79.3 | 56.7 | 61.2 | 7.6 | 3.40E+07 | 680.0 |
| TIL 386 | 31.8 | 35.5 | 0.5 | 62.9 | 61.1 | 25.0 | 4.60E+07 | 920.0 |
| TIL 388 | 45.8 | 55.6 | 31.6 | 46.8 | 46.7 | 66.5 | 1.60E+06 | 32.0 |
| TIL 389 | 39.6 | 41.0 | 84.5 | 56.9 | 50.0 | 14.1 | 1.80E+07 | 360.0 |
| TIL 390 | 26.5 | 34.6 | 30.9 | 67.6 | 61.4 | 65.2 | 1.50E+07 | 300.0 |
| TIL 391 | 39.1 | 41.1 | 99.9 | 53.5 | 51.8 | 0.0 | 3.90E+07 | 780.0 |
| TIL 392 | 20.5 | 30.0 | 21.6 | 69.8 | 68.0 | 73.8 | 3.00E+05 | 6.0 |
| TIL 393 | 21.0 | 30.6 | 66.0 | 75.9 | 61.6 | 27.5 | 3.80E+07 | 760.0 |
| TIL 394 | 40.5 | 38.6 | 47.3 | 53.9 | 59.9 | 50.3 | 1.05E+08 | 2100.0 |
| TIL 395 | 28.3 | 29.2 | 34.1 | 75.7 | 70.3 | 60.1 | 3.50E+07 | 700.0 |
| TIL 396 | 40.8 | 44.5 | 22.6 | 53.2 | 54.3 | 76.4 | 6.00E+06 | 120.0 |
| TIL 397 | 35.2 | 39.9 | 21.7 | 60.9 | 55.9 | 77.6 | 3.80E+07 | 760.0 |
| TIL 398 | 38.4 | 49.7 | 7.1 | 54.8 | 50.2 | 90.2 | 5.70E+06 | 114.0 |
| TIL 399 | 33.9 | 45.3 | 1.2 | 60.4 | 45.5 | 87.5 | 2.70E+07 | 540.0 |
| TIL 400 | 56.1 | 51.8 | 35.9 | 41.6 | 45.8 | 62.5 | 6.50E+06 | 130.0 |
| TIL 401 | 61.1 | 50.1 | 6.2 | 31.4 | 49.5 | 93.2 | 6.80E+06 | 136.0 |
| TIL 402 | 36.3 | 42.9 | 38.9 | 52.4 | 42.5 | 57.4 | 2.50E+07 | 500.0 |
| TIL 403 | 33.2 | 37.8 | 25.7 | 63.3 | 58.8 | 47.8 | 1.60E+07 | 320.0 |
| TIL 404 | 31.0 | 45.2 | 73.4 | 58.1 | 42.1 | 18.6 | 1.80E+08 | 3600.0 |
| TIL 405 | 39.9 | 42.9 | 88.5 | 57.0 | 52.8 | 10.1 | 9.60E+05 | 19.2 |
| TIL 406 | 41.4 | 39.5 | 92.2 | 51.1 | 50.9 | 7.2 | 1.60E+07 | 320.0 |
| TIL 407 | 48.3 | 47.1 | 86.5 | 36.2 | 48.3 | 11.3 | 2.70E+05 | 5.4 |
| TIL 408 | 48.2 | 45.8 | 40.5 | 47.2 | 49.1 | 59.5 | 6.90E+06 | 138.0 |
| TIL 409 | 52.4 | 59.9 | 1.9 | 45.9 | 35.9 | 96.6 | 6.60E+06 | 132.0 |
| TIL 410 | 30.8 | 44.5 | 12.6 | 63.2 | 51.3 | 86.3 | 1.50E+07 | 300.4 |
| TIL 411 | 35.2 | 30.9 | 21.7 | 61.9 | 69.9 | 76.9 | 1.90E+07 | 380.0 |
| TIL 412 | 48.4 | 43.1 | 85.4 | 44.5 | 51.4 | 3.8 | 2.50E+05 | 5.0 |
| TIL 413 | 55.4 | 59.2 | 97.7 | 36.9 | 31.4 | 0.4 | 5.00E+04 | 1.0 |
| TIL 414 | 23.2 | 32.0 | 56.9 | 72.5 | 64.1 | 32.9 | 1.20E+06 | 24.0 |
| TIL 415 | 22.7 | 46.3 | 56.2 | 68.8 | 47.6 | 33.2 | 1.00E+06 | 20.0 |
| TIL 416 | 44.0 | 79.0 | 79.3 | 51.9 | 18.1 | 13.3 | 7.00E+05 | 14.0 |
| TIL 417 | 20.5 | 30.0 | 21.6 | 69.8 | 68.0 | 73.8 | 3.00E+05 | 6.0 |
| TIL 418 | 45.3 | 53.9 | 50.1 | 49.7 | 42.0 | 46.2 | 2.00E+06 | 40.0 |
| TIL 419 | 53.9 | 40.6 | 39.3 | 39.7 | 47.6 | 69.5 | 7.00E+06 | 140.0 |
| TIL 420 | 46.1 | 46.0 | 20.9 | 48.7 | 41.4 | 77.6 | 2.40E+05 | 4.8 |
| TIL 421 | 58.8 | 84.7 | 80.6 | 33.5 | 10.0 | 6.5 | 1.50E+06 | 30.0 |
| TIL 422 | 43.0 | 63.5 | 70.1 | 46.2 | 26.5 | 29.0 | 1.00E+05 | 2.0 |
| TIL 423 | 37.5 | 29.9 | 21.3 | 56.0 | 63.6 | 76.4 | 1.20E+06 | 24.0 |
| TIL 424 | 58.0 | 48.3 | 50.1 | 36.9 | 41.7 | 49.0 | 2.00E+05 | 4.0 |
| TIL 425 | 40.8 | 54.5 | 8.6 | 63.2 | 51.3 | 86.3 | 2.00E+07 | 400.0 |
| TIL 426 | 22.1 | 40.5 | 11.1 | 75.3 | 58.9 | 88.1 | 4.40E+05 | 8.8 |
| TIL 427 | 26.4 | 22.7 | 18.3 | 70.6 | 72.1 | 81.2 | 2.00E+05 | 4.0 |
| TIL 428 | 35.6 | 45.9 | 44.3 | 58.1 | 45.5 | 52.0 | 4.60E+07 | 920.0 |
| TIL 429 | 40.5 | 50.3 | 52.8 | 48.1 | 43.0 | 43.1 | 7.40E+07 | 1480.0 |
| TIL 430 | 21.6 | 36.9 | 1.5 | 71.9 | 56.1 | 96.6 | 1.10E+08 | 2200.0 |
| TIL 431 | 30.8 | 62.9 | 23.7 | 64.3 | 34.5 | 62.7 | 1.10E+08 | 2200.0 |
| TIL 432 | 54.7 | 34.7 | 13.8 | 41.5 | 52.8 | 82.3 | 2.00E+06 | 40.0 |
| TIL 433 | 63.0 | 36.6 | 45.3 | 28.6 | 44.7 | 53.4 | 7.50E+06 | 150.0 |
| TIL 434 | 25.2 | 40.9 | 8.7 | 71.9 | 56.9 | 88.9 | 4.50E+07 | 900.0 |
| TIL 435 | 40.4 | 34.8 | 30.5 | 50.3 | 58.0 | 65.8 | 5.40E+07 | 1080.0 |
| TIL 436 | 54.9 | 58.5 | 26.5 | 38.6 | 36.2 | 65.4 | 2.70E+04 | 0.5 |

CD4+ and CD8+ were gated on CD45bright CD3+; pre-enrichment: after removal of debris using debris removal solution; post-enrichment: after CD137 magnetic enrichment; end of culture: day 18 for expanded, day 14 for not expanded tr-TILs. In red not expanded tr-TILs. In blue tr-TIL samples subjected to in vitro functional molecular characterization. Highlighted light blue IDH1 mutant samples.

**Table S4. Memory of TILs on day 0 and at the end of the culture**

|  | **Day 0** | | | | | | **End of culture** | | | | | |
| --- | --- | --- | --- | --- | --- | --- | --- | --- | --- | --- | --- | --- |
|  | CD8+ | | | CD4+ | | | CD8+ | | | CD4+ | | |
|  | **naive/scm** | **TCM** | **TEM** | **naive/scm** | **TCM** | **TEM** | **naive/scm** | **TCM** | **TEM** | **naive/scm** | **TCM** | **TEM** |
| TIL 240 | 22.9 | 54.5 | 14.7 | 5.9 | 65.9 | 27.6 | 1.2 | 82.3 | 16.2 | 0.0 | 65.2 | 42.5 |
| TIL 247 | 2.7 | 67.4 | 28.3 | 1.8 | 58.7 | 38.6 | 0.0 | 89.6 | 13.8 |  |  |  |
| TIL 254 | 12.7 | 61.0 | 24.7 | 10.3 | 66.3 | 39.8 | 1.2 | 96.3 | 2.3 | 0.9 | 75.2 | 16.4 |
| TIL 262 | 24.4 | 22.7 | 23.5 | 2.1 | 35.7 | 60.9 | 0.4 | 97.1 | 2.8 | 0.0 | 88.3 | 14.2 |
| TIL 264 | 12.7 | 58.6 | 36.3 | 2.9 | 50.3 | 44.3 | 1.6 | 38.8 | 61.2 | 0.0 | 69.5 | 34.2 |
| TIL 265 | 7.2 | 33.7 | 54.3 | 10.3 | 46.4 | 58.2 | 0.0 | 88.2 | 10.6 | 0.0 | 84.4 | 14.3 |
| TIL 266 | 15.1 | 19.2 | 26.1 | 6.7 | 28.7 | 49.5 | 0.0 | 96.2 | 3.2 | 2.3 | 65.3 | 26.1 |
| TIL 268 | 13.6 | 50.3 | 26.1 | 4.2 | 64.3 | 29.4 | 0.0 | 78.4 | 22.2 | 0.0 | 80.8 | 14.9 |
| TIL 269 | 8.5 | 14.5 | 55.6 | 9.8 | 20.9 | 55.3 | 0.0 | 98.2 | 0.5 | 5.0 | 78.9 | 10.3 |
| TIL 270 | 24.6 | 22.2 | 53.1 | 4.1 | 31.2 | 55.6 | 0.0 | 53.4 | 45.7 | 2.4 | 79.2 | 17.3 |
| TIL 271 | 25.6 | 45.2 | 14.4 | 14.4 | 57.0 | 19.6 |  |  |  | 0.2 | 21.2 | 80.8 |
| TIL 273 | 8.7 | 59.7 | 27.2 | 4.3 | 60.9 | 32.9 | 0.0 | 45.0 | 20.7 | 0.2 | 82.6 | 4.1 |
| TIL 274 | 1.8 | 87.9 | 9.7 | 1.3 | 81.4 | 16.6 | 0.0 | 45.0 | 75.0 | 0.6 | 98.0 | 1.0 |
| TIL 275 | 1.5 | 89.6 | 8.9 | 1.1 | 86.1 | 12.8 | 0.0 | 34.0 | 56.0 | 0.1 | 80.5 | 14.8 |
| TIL 276 | 5.8 | 83.8 | 7.7 | 5.9 | 85.4 | 7.0 |  |  |  | 0.1 | 73.2 | 21.3 |
| TIL 277 | 5.2 | 75.6 | 17.8 | 5.1 | 69.4 | 25.3 | 0.0 | 45.0 | 67.0 | 0.3 | 83.4 | 10.5 |
| TIL 278 | 3.0 | 73.2 | 21.9 | 1.1 | 78.1 | 20.2 | 0.0 | 34.0 | 69.0 | 1.7 | 72.5 | 21.6 |
| TIL 279 | 5.2 | 78.4 | 16.0 | 0.9 | 74.2 | 24.9 | 0.0 | 45.0 | 66.0 | 1.0 | 30.9 | 71.3 |
| TIL 280 | 3.3 | 72.7 | 22.6 | 2.1 | 66.2 | 30.3 | 0.0 | 25.0 | 67.0 | 0.3 | 66.2 | 33.1 |
| TIL 281 | 8.6 | 80.3 | 10.5 | 8.9 | 73.3 | 16.8 | 5.1 | 42.0 | 55.0 | 0.1 | 0.5 | 94.8 |
| TIL 282 | 1.9 | 89.2 | 8.4 | 0.7 | 86.7 | 13.1 |  |  |  | 0.2 | 83.3 | 66.7 |
| TIL 283 | 15.6 | 71.1 | 11.1 | 5.7 | 78.9 | 15.0 |  |  |  | 0.1 | 10.4 | 82.1 |
| TIL 284 | 7.1 | 53.0 | 33.1 | 15.3 | 75.0 | 8.8 |  |  |  | 0.1 | 80.1 | 15.0 |
| TIL 285 | 7.3 | 68.8 | 18.0 | 9.7 | 68.2 | 17.5 | 0.0 | 23.0 | 43.0 | 1.3 | 83.3 | 14.7 |
| TIL 286 | 2.3 | 77.6 | 22.4 | 6.3 | 78.1 | 11.9 | 0.7 | 25.0 | 67.0 | 5.2 | 41.0 | 42.3 |
| TIL 287 | 15.3 | 64.7 | 14.0 | 8.0 | 70.0 | 18.1 | 0.0 | 34.0 | 78.0 | 2.4 | 80.2 | 16.4 |
| TIL 288 | 9.5 | 62.3 | 22.2 | 18.7 | 50.1 | 17.3 |  |  |  | 0.1 | 10.3 | 88.9 |
| TIL 289 | 4.8 | 57.9 | 32.2 | 1.2 | 56.4 | 41.3 |  |  |  | 0.1 | 99.7 | 0.3 |
| TIL 293 | 20.2 | 70.5 | 6.8 | 9.7 | 68.2 | 17.5 |  |  |  | 5.1 | 16.8 | 78.3 |
| TIL 294 | 55.2 | 35.1 | 44.7 | 0.1 | 88.1 | 11.9 |  |  |  | 3.4 | 14.9 | 80.1 |
| TIL 295 | 24.5 | 57.7 | 30.3 | 8.0 | 70.1 | 18.1 | 0.0 | 50.2 | 48.3 |  |  |  |
| TIL 296 | 12.0 | 54.9 | 27.6 | 16.9 | 54.4 | 23.9 | 0.6 | 78.6 | 19.9 | 0.4 | 51.0 | 42.3 |
| TIL 297 | 41.1 | 33.7 | 21.5 | 18.7 | 50.1 | 17.3 | 0.0 | 55.3 | 20.3 |  |  |  |
| TIL 298 | 11.5 | 41.4 | 31.9 | 1.2 | 56.4 | 41.3 | 0.0 | 18.7 | 61.6 | 0.0 | 0.3 | 99.1 |
| TIL 299 | 34.5 | 25.5 | 22.0 | 11.1 | 73.6 | 12.9 | 0.1 | 65.6 | 34.3 | 0.1 | 23.0 | 78.1 |
| TIL 300 | 18.5 | 11.5 | 37.8 | 8.4 | 80.9 | 10.3 | 1.3 | 23.1 | 75.9 | 4.2 | 32.9 | 46.3 |
| TIL 301 | 52.0 | 25.2 | 12.2 | 10.9 | 72.2 | 15.4 | 4.0 | 13.3 | 79.1 | 2.1 | 67.0 | 39.5 |
| TIL 302 | 32.3 | 27.8 | 15.0 | 20.3 | 48.2 | 51.8 | 0.0 | 29.3 | 70.7 |  |  |  |
| TIL 303 | 23.7 | 24.5 | 22.3 | 4.2 | 36.9 | 63.0 | 0.0 | 30.6 | 69.3 | 0.2 | 30.5 | 69.5 |
| TIL 304 | 46.3 | 20.6 | 10.7 | 22.4 | 37.1 | 61.3 | 0.0 | 18.9 | 79.2 | 4.3 | 14.2 | 82.1 |
| TIL 305 | 21.6 | 36.2 | 26.5 | 20.3 | 50.3 | 48.2 | 0.8 | 69.2 | 29.6 |  |  |  |
| TIL 307 | 33.3 | 40.3 | 39.6 | 12.6 | 36.3 | 51.9 | 0.6 | 40.2 | 59.7 | 0.0 | 32.0 | 68.3 |
| TIL 308 | 51.9 | 26.7 | 8.3 | 1.7 | 80.1 | 25.6 | 0.7 | 22.3 | 76.0 | 0.0 | 52.5 | 45.2 |
| TIL 309 | 44.6 | 22.7 | 10.0 | 0.2 | 47.4 | 51.7 | 10.9 | 41.4 | 54.2 | 0.0 | 50.9 | 48.0 |
| TIL 310 | 26.1 | 41.7 | 13.5 | 3.1 | 12.5 | 68.7 |  |  |  | 0.0 | 89.2 | 10.3 |
| TIL 311 | 13.7 | 44.7 | 29.2 | 22.4 | 28.9 | 35.8 | 1.1 | 84.6 | 23.8 | 0.0 | 86.4 | 85.2 |
| TIL 312 | 11.1 | 66.1 | 32.4 | 21.2 | 42.3 | 35.6 | 0.4 | 52.6 | 22.5 | 0.0 | 1.9 | 98.2 |
| TIL 313 | 8.0 | 65.2 | 14.6 | 6.3 | 64.2 | 24.7 | 2.2 | 73.2 | 17.8 | 0.0 | 90.9 | 5.7 |
| TIL 314 | 12.4 | 54.6 | 23.7 | 2.7 | 37.8 | 57.6 | 0.6 | 66.9 | 20.2 | 0.0 | 88.6 | 16.2 |
| TIL 315 | 6.6 | 83.6 | 5.9 | 2.2 | 51.4 | 39.6 | 1.2 | 71.1 | 22.1 | 0.0 | 98.4 | 1.0 |
| TIL 316 | 13.4 | 46.0 | 22.8 | 0.3 | 68.2 | 30.6 | 2.1 | 12.6 | 83.3 |  |  |  |
| TIL 317 | 1.7 | 72.7 | 24.4 | 0.3 | 97.3 | 2.0 | 3.0 | 3.3 | 90.2 | 0.0 | 12.4 | 82.5 |
| TIL 318 | 3.9 | 76.9 | 17.6 | 0.1 | 91.8 | 8.1 |  |  |  | 0.0 | 44.7 | 56.0 |
| TIL 319 | 4.4 | 58.2 | 33.4 | 12.3 | 28.5 | 48.6 |  |  |  | 0.0 | 21.3 | 81.8 |
| TIL 320 | 36.8 | 32.5 | 14.2 | 27.2 | 19.2 | 32.8 | 0.1 | 73.3 | 18.2 | 0.0 | 98.7 | 2.4 |
| TIL 321 | 17.9 | 38.3 | 27.2 | 6.3 | 48.1 | 35.8 |  |  |  | 0.0 | 94.1 | 3.6 |
| TIL 322 | 5.6 | 58.5 | 31.0 | 20.4 | 33.0 | 27.4 | 4.0 | 64.9 | 25.2 | 0.0 | 76.2 | 26.2 |
| TIL 323 | 5.5 | 66.6 | 25.5 | 20.3 | 17.2 | 15.6 |  |  |  | 0.0 | 95.2 | 2.1 |
| TIL 324 | 2.3 | 78.7 | 18.0 | 11.2 | 35.4 | 34.2 | 2.3 | 90.7 | 3.9 | 0.0 | 98.2 | 0.2 |
| TIL 325 | 11.5 | 69.6 | 18.4 | 6.6 | 22.8 | 48.0 | 0.5 | 0.7 | 95.0 | 0.0 | 2.3 | 94.8 |
| TIL 326 | 11.9 | 65.3 | 30.8 | 23.4 | 12.8 | 19.1 | 0.2 | 40.1 | 65.3 | 0.0 | 83.3 | 26.7 |
| TIL 327 | 13.3 | 56.8 | 36.5 | 24.3 | 31.1 | 20.3 | 4.2 | 80.9 | 13.2 | 0.0 | 66.1 | 34.0 |
| TIL 328 | 23.6 | 51.5 | 21.2 | 19.3 | 25.7 | 38.6 | 0.1 | 65.6 | 35.7 | 0.0 | 60.0 | 42.3 |
| TIL 330 | 12.6 | 52.7 | 40.9 | 4.2 | 54.2 | 41.7 | 0.1 | 55.2 | 37.9 | 0.0 | 78.3 | 21.3 |
| TIL 331 | 19.7 | 53.9 | 27.3 | 1.8 | 54.6 | 42.6 | 4.6 | 18.7 | 71.6 | 0.1 | 99.7 | 0.1 |
| TIL 333 | 13.6 | 50.3 | 26.1 | 13.5 | 62.8 | 12.1 | 3.1 | 54.0 | 56.4 | 0.0 | 21.9 | 78.1 |
| TIL 334 | 12.0 | 54.9 | 27.6 | 4.3 | 61.1 | 36.3 | 1.3 | 76.2 | 24.5 | 1.4 | 13.0 | 88.9 |
| TIL 335 | 10.4 | 64.0 | 21.6 | 9.3 | 55.7 | 39.9 | 0.4 | 97.1 | 2.9 | 0.1 | 40.9 | 22.5 |
| TIL 336 | 19.8 | 72.4 | 5.7 | 11.1 | 73.6 | 12.9 |  |  |  | 0.2 | 50.2 | 79.1 |
| TIL 337 | 9.5 | 74.0 | 5.5 | 8.4 | 80.9 | 10.3 | 0.3 | 60.9 | 39.3 | 0.0 | 23.0 | 51.0 |
| TIL 338 | 12.9 | 63.8 | 32.1 | 13.5 | 11.1 | 67.2 | 1.3 | 63.7 | 37.8 | 0.2 | 99.8 | 0.1 |
| TIL 339 | 19.3 | 47.1 | 22.5 | 11.1 | 67.2 | 1.3 | 0.6 | 89.2 | 9.1 |  |  |  |
| TIL 340 | NP | NP | NP | NP | NP | NP | 0.4 | 38.9 | 60.5 | 1.99 | 22.05 | 72.2 |
| TIL341 | NP | NP | NP | NP | NP | NP | 1.2 | 46.7 | 41.6 | 2.8 | 45.9 | 48.8 |
| TIL 342 | NP | NP | NP | NP | NP | NP | 0.6 | 57.4 | 39.6 | 0 | 12.3 | 71.3 |
| TIL 343 | NP | NP | NP | NP | NP | NP | 0.5 | 24.7 | 74.1 | 0.07 | 6.44 | 93.1 |
| TIL 344 | NP | NP | NP | NP | NP | NP | 0.2 | 99.5 | 0 |  |  |  |
| TIL 346 | NP | NP | NP | NP | NP | NP | 0.7 | 93.4 | 5.9 |  |  |  |
| TIL 348 | NP | NP | NP | NP | NP | NP | 1.9 | 88.6 | 10.3 |  |  |  |
| TIL 349 | NP | NP | NP | NP | NP | NP | 4 | 95.1 | 0.2 |  |  |  |
| TIL 350 | NP | NP | NP | NP | NP | NP | 1.4 | 98.6 | 0 | 0.02 | 70.6 | 26.9 |
| TIL 351 | NP | NP | NP | NP | NP | NP | 0.3 | 45.6 | 51.1 | 0.45 | 92.12 | 6.15 |
| TIL 352 | NP | NP | NP | NP | NP | NP | 0.9 | 50.7 | 40.5 | 2.31 | 6.8 | 88.8 |
| TIL 353 | NP | NP | NP | NP | NP | NP | 0 | 49.2 | 50.6 |  |  |  |
| TIL 354 | NP | NP | NP | NP | NP | NP | 0 | 2.2 | 97.5 | 0.01 | 2.43 | 97.3 |
| TIL 356 | NP | NP | NP | NP | NP | NP |  |  |  | 0.08 | 0.57 | 99 |
| TIL 358 | NP | NP | NP | NP | NP | NP |  |  |  | 0 | 89.1 | 9.9 |
| TIL 359 | NP | NP | NP | NP | NP | NP | 0 | 26 | 77 | 1.34 | 31.+ | 63.8 |
| TIL 360 | NP | NP | NP | NP | NP | NP | 2.5 | 58.5 | 25 |  |  |  |
| TIL 361 | NP | NP | NP | NP | NP | NP | 0 | 1.2 | 97.1 |  |  |  |
| TIL 362 | NP | NP | NP | NP | NP | NP | 3.5 | 62.3 | 32.5 | 1.57 | 48.9 | 48.9 |
| TIL 363 | NP | NP | NP | NP | NP | NP | 0.1 | 51.3 | 48.5 | 0.01 | 80.2 | 15.9 |
| TIL 364 | NP | NP | NP | NP | NP | NP | 4.9 | 51.5 | 39.9 | 0.61 | 68.3 | 30.9 |
| TIL 365 | NP | NP | NP | NP | NP | NP |  |  |  | 0.41 | 45.3 | 53.8 |
| TIL 366 | NP | NP | NP | NP | NP | NP | 0.9 | 39.3 | 58.2 |  |  |  |
| TIL 367 | NP | NP | NP | NP | NP | NP | 0 | 98.3 | 0.9 | 0 | 99.1 | 0.02 |
| TIL 368 | NP | NP | NP | NP | NP | NP | 0.1 | 52.6 | 47.3 | 0.9 | 48.5 | 49.5 |
| TIL 369 | NP | NP | NP | NP | NP | NP | 0.2 | 82.4 | 16.7 | 14.6 | 48.6 | 30.2 |
| TIL 370 | NP | NP | NP | NP | NP | NP | 0 | 4.8 | 95.2 | 0.17 | 2.61 | 96.3 |
| TIL 371 | NP | NP | NP | NP | NP | NP | 0 | 0.1 | 98.9 |  |  |  |
| TIL 372 | NP | NP | NP | NP | NP | NP | 0 | 89.3 | 21.4 |  |  |  |
| TIL 373 | NP | NP | NP | NP | NP | NP | 0.1 | 57.9 | 41.9 | 0.7 | 79.2 | 20.3 |
| TIL 374 | NP | NP | NP | NP | NP | NP | 1.8 | 59.5 | 38.7 | 0.7 | 36.2 | 63.1 |
| TIL 377 | NP | NP | NP | NP | NP | NP |  |  |  | 0.4 | 47.5 | 51.4 |
| TIL 378 | NP | NP | NP | NP | NP | NP | 0 | 86.3 | 10.9 | 1.3 | 86.3 | 9.87 |
| TIL 379 | NP | NP | NP | NP | NP | NP | 0 | 38.4 | 61.9 | 0.1 | 89.21 | 8.96 |
| TIL 381 | NP | NP | NP | NP | NP | NP | 1.6 | 50.8 | 46.9 | 0.3 | 43.6 | 56.1 |
| TIL 382 | NP | NP | NP | NP | NP | NP |  |  |  | 0.01 | 44 | 55.9 |
| TIL 383 | NP | NP | NP | NP | NP | NP | 16.3 | 37.8 | 28.5 | 0.6 | 51.3 | 47.2 |
| TIL 384 | NP | NP | NP | NP | NP | NP |  |  |  | 0.5 | 30.1 | 67.7 |
| TIL 385 | NP | NP | NP | NP | NP | NP | 0 | 43.2 | 56.7 | 2.6 | 41.9 | 52.2 |
| TIL 386 | NP | NP | NP | NP | NP | NP | 1.4 | 39.7 | 60.3 |  |  |  |
| TIL 388 | NP | NP | NP | NP | NP | NP | 0.6 | 62.0 | 37.6 | 0.0 | 66.2 | 33.8 |
| TIL 389 | NP | NP | NP | NP | NP | NP | 0.0 | 47.4 | 52.6 | 0.1 | 43.5 | 56.4 |
| TIL 390 | NP | NP | NP | NP | NP | NP | 1.5 | 77.1 | 20.9 | 0.1 | 68.1 | 31.6 |
| TIL 391 | NP | NP | NP | NP | NP | NP |  |  |  | 0.0 | 66.2 | 33.8 |
| TIL 392 | NP | NP | NP | NP | NP | NP | 0.6 | 62.0 | 37.6 | 0.0 | 23.5 | 83.4 |
| TIL 393 | NP | NP | NP | NP | NP | NP | 0.71 | 91.16 | 5.11 | 2.31 | 82.19 | 14.69 |
| TIL 399 | NP | NP | NP | NP | NP | NP | 0.13 | 84.19 | 12.71 | 0.09 | 72.38 | 27.49 |
| TIL 402 | NP | NP | NP | NP | NP | NP | 0.45 | 82.34 | 15.6 | 1.1 | 61.82 | 35.04 |
| TIL 403 | NP | NP | NP | NP | NP | NP | 3.7 | 67.4 | 27.6 | 5.6 | 80.33 | 11.67 |
| TIL 404 | NP | NP | NP | NP | NP | NP | 1.3 | 71.4 | 19.66 | 1.4 | 72.32 | 25.3 |
| TIL 405 | NP | NP | NP | NP | NP | NP | 0.0 | 78.8 | 18.6 | 1.3 | 66 | 29 |
| TIL 406 | NP | NP | NP | NP | NP | NP | 2.1 | 82.2 | 11.4 | 0.1 | 87.3 | 12.0 |
| TIL 407 | NP | NP | NP | NP | NP | NP | 1.3 | 69.8 | 20.9 | 2.3 | 18.17 | 77.1 |
| TIL 412 | NP | NP | NP | NP | NP | NP | 1.2 | 86.4 | 10.3 | 3.4 | 76.05 | 18.13 |
| TIL 413 | NP | NP | NP | NP | NP | NP |  |  |  | 20.6 | 55.3 | 15.0 |
| TIL 414 | NP | NP | NP | NP | NP | NP | 0.9 | 91.2 | 7.8 | 0.1 | 94.7 | 5.2 |
| TIL 415 | NP | NP | NP | NP | NP | NP | 6.7 | 66.5 | 22.1 | 1.9 | 67.9 | 29.9 |
| TIL 416 | NP | NP | NP | NP | NP | NP | 12.6 | 66.1 | 16.4 | 2.5 | 79.0 | 17.6 |
| TIL 417 | NP | NP | NP | NP | NP | NP | 3.6 | 78.3 | 17.1 | 0.5 | 76.5 | 22.0 |
| TIL 418 | NP | NP | NP | NP | NP | NP | 1.8 | 80.5 | 17.6 | 0.1 | 80.1 | 19.9 |
| TIL 419 | NP | NP | NP | NP | NP | NP | 1.8 | 77.0 | 20.9 | 0.6 | 80.7 | 18.7 |
| TIL 420 | NP | NP | NP | NP | NP | NP | 0.0 | 89.1 | 7.8 | 2.6 | 67.1 | 36.4 |
| TIL 421 | NP | NP | NP | NP | NP | NP | 3.1 | 70.4 | 21.3 | 4.3 | 76.2 | 15.0 |
| TIL 422 | NP | NP | NP | NP | NP | NP | 0.1 | 57.1 | 40.7 | 1.3 | 78.9 | 13.3 |
| TIL 423 | NP | NP | NP | NP | NP | NP | 3.1 | 62.5 | 28.3 | 0.2 | 65.4 | 31.3 |
| TIL 424 | NP | NP | NP | NP | NP | NP | 0.6 | 62.0 | 37.6 | 1.0 | 68.1 | 29.1 |
| TIL 426 | NP | NP | NP | NP | NP | NP | 5.7 | 88.7 | 4.9 | 1.5 | 55.3 | 38.2 |
| TIL 427 | NP | NP | NP | NP | NP | NP | 0.1 | 10.1 | 88.1 | 1.3 | 73.2 | 18.2 |
| TIL 428 | NP | NP | NP | NP | NP | NP | 2.6 | 21.3 | 75.2 | 0.0 | 87.3 | 12.7 |
| TIL 429 | NP | NP | NP | NP | NP | NP | 0.4 | 86.7 | 10.9 | 0.1 | 88.2 | 11.8 |
| TIL 430 | NP | NP | NP | NP | NP | NP | 16.1 | 70.8 | 12.0 |  |  |  |
| TIL 431 | NP | NP | NP | NP | NP | NP | 0.2 | 85.3 | 14.4 | 0.2 | 81.2 | 18.5 |
| TIL 432 | NP | NP | NP | NP | NP | NP | 11.4 | 72.6 | 13.1 | 6.3 | 81.9 | 11.2 |
| TIL 435 | NP | NP | NP | NP | NP | NP | 0.9 | 91.8 | 5.24 | 12.0 | 51.1 | 34.1 |
| TIL 436 | NP | NP | NP | NP | NP | NP | 1.3 | 80.3 | 16.7 | 3.4 | 61.6 | 29.2 |

pre-enrichment (gated on CD137+); end of culture: day 18 for expanded, day 14 for not expanded tr-TILs. Abbreviations. TCM: T central memory; TEM: T effector memory. NP= not performed. In red not expanded tr-TILs. In blue tr-TIL samples subjected to in vitro functional molecular characterization. Highlighted light blue IDH1 mutant samples.

**Table S5. Exhaustion of TILs on day 0 and at the end of the culture**

|  | **Day 0** | | | | | | **End of culture** | | | | | |
| --- | --- | --- | --- | --- | --- | --- | --- | --- | --- | --- | --- | --- |
|  | CD8+ | | | CD4+ | | | CD8+ | | | CD4+ | | |
|  | **LAG-3** | **TIM-3** | **PD-1** | **LAG-3** | **TIM-3** | **PD-1** | **LAG-3** | **TIM-3** | **PD-1** | **LAG-3** | **TIM-3** | **PD-1** |
| TIL 240 | 35.1 | 38.4 | 26.7 | 56.0 | 57.5 | 32.1 | 67.2 | 3.6 | 11.8 | 3.4 | 4.2 | 12.0 |
| TIL 247 | 31.1 | 46.8 | 90.8 | 41.2 | 31.5 | 12.6 | 84.2 | 89.7 | 11.8 |  |  |  |
| TIL 254 | 1.0 | 13.8 | 26.8 | 31.2 | 81.5 | 25.1 | 68.0 | 22.0 | 56.0 | 32.0 | 26.1 | 80.0 |
| TIL 262 | 49.8 | 38.3 | 82.7 | 51.5 | 48.2 | 79.+6 | 43.0 | 23.0 | 43.0 | 7.0 | 22.3 | 49.1 |
| TIL 264 | 61.5 | 57.2 | 65.4 | 62.7 | 54.6 | 67.0 | 54.0 | 56.0 | 77.0 | 1.0 | 13.8 | 26.8 |
| TIL 265 | 58.3 | 42.9 | 41.9 | 48.6 | 35.3 | 54.4 | 24.0 | 44.0 | 76.0 | 5.6 | 27.8 | 31.5 |
| TIL 266 | 41.2 | 34.0 | 45.5 | 43.9 | 38.3 | 63.5 | 35.0 | 25.0 | 67.0 | 8.4 | 7.4 | 29.5 |
| TIL 268 | 45.2 | 42.1 | 63.1 | 36.3 | 33.3 | 49.2 | 81.3 | 40.9 | 22.5 | 4.6 | 9.6 | 75.7 |
| TIL 269 | 78.8 | 14.5 | 54.9 | 76.5 | 20.3 | 52.1 | 33.8 | 50.2 | 79.1 | 12.0 | 3.4 | 45.7 |
| TIL 270 | 46.8 | 31.2 | 56.3 | 44.8 | 31.9 | 45.8 | 43.2 | 34.7 | 81.2 | 17.0 | 3.0 | 47.6 |
| TIL 271 | 19.3 | 30.8 | 55.8 | 22.6 | 44.8 | 30.1 |  |  |  | 1.2 | 32.0 | 45.0 |
| TIL 273 | 30.0 | 55.1 | 59.6 | 25.4 | 71.0 | 34.7 | 82.0 | 45.0 | 20.7 | 1.2 | 13.6 | 9.9 |
| TIL 274 | 12.8 | 70.8 | 74.1 | 13.8 | 50.5 | 23.7 | 68.0 | 45.0 | 75.0 | 0.0 | 0.0 | 0.0 |
| TIL 275 | 6.5 | 1.4 | 70.1 | 12.1 | 60.8 | 47.6 | 56.0 | 34.0 | 56.0 | 0.6 | 0.5 | 0.5 |
| TIL 276 | 20.8 | 28.1 | 57.8 | 22.1 | 48.9 | 37.5 |  |  |  | 2.9 | 23.0 | 65.0 |
| TIL 277 | 16.4 | 55.1 | 57.4 | 21.8 | 48.7 | 26.0 | 43.0 | 45.0 | 67.0 | 21.0 | 23.0 | 45.0 |
| TIL 278 | 18.1 | 26.5 | 66.4 | 15.2 | 55.3 | 26.0 | 67.0 | 34.0 | 69.0 | 1.9 | 2.5 | 1.6 |
| TIL 279 | 14.5 | 28.0 | 63.8 | 7.9 | 63.2 | 22.1 | 24.0 | 45.0 | 66.0 | 26.0 | 13.0 | 34.0 |
| TIL 280 | 17.8 | 55.2 | 64.6 | 15.2 | 51.5 | 32.1 | 87.0 | 25.0 | 67.0 | 11.0 | 23.0 | 34.0 |
| TIL 281 | 16.5 | 40.8 | 50.2 | 20.6 | 36.5 | 47.3 | 78.0 | 32.0 | 45.0 | 58.0 | 34.0 | 56.0 |
| TIL 282 | 15.3 | 25.1 | 63.6 | 10.9 | 30.1 | 23.5 |  |  |  | 15.0 | 12.0 | 7.0 |
| TIL 283 | 10.9 | 27.7 | 54.9 | 16.6 | 44.4 | 22.7 |  |  |  | 79.0 | 67.0 | 89.0 |
| TIL 284 | 23.8 | 23.7 | 42.5 | 27.8 | 62.5 | 23.2 |  |  |  | 5.0 | 21.0 | 32.0 |
| TIL 285 | 20.2 | 21.4 | 70.5 | 26.0 | 52.2 | 24.5 | 78.0 | 54.0 | 54.0 | 0.3 | 32.0 | 34.0 |
| TIL 286 | 23.8 | 15.5 | 42.4 | 15.8 | 42.1 | 21.2 |  |  |  | 14.7 | 7.0 | 15.8 |
| TIL 287 | 27.0 | 23.0 | 47.6 | 23.2 | 34.3 | 36.3 | 76.0 | 34.0 | 78.0 | 7.0 | 3.0 | 23.0 |
| TIL 288 | 22.7 | 11.1 | 55.4 | 23.1 | 50.4 | 24.5 |  |  |  | 48.5 | 24.7 | 26.3 |
| TIL 289 | 19.8 | 20.7 | 61.5 | 17.0 | 43.9 | 11.8 |  |  |  | 2.9 | 89.6 | 0.3 |
| TIL 293 | 28.0 | 41.1 | 9.8 | 33.2 | 53.7 | 2.0 |  |  |  | 21.4 | 34.6 | 34.7 |
| TIL 294 | 55.2 | 35.1 | 44.7 | 2.4 | 16.7 | 11.0 |  |  |  | 23.0 | 33.7 | 9.2 |
| TIL 295 | 24.2 | 57.7 | 30.3 | 6.5 | 62.8 | 21.0 | 77.6 | 90.1 | 0.2 |  |  |  |
| TIL296 | 17.0 | 45.4 | 51.2 | 6.8 | 55.6 | 24.5 | 34.0 | 23.0 | 51.0 | 22.4 | 41.0 | 22.3 |
| TIL 297 | 41.1 | 33.7 | 21.5 | 11.3 | 69.5 | 14.0 | 80.3 | 80.9 | 82.5 |  |  |  |
| TIL 298 | 11.5 | 41.4 | 31.9 | 5.6 | 72.5 | 12.0 | 43.3 | 90.2 | 59.1 | 0.6 | 34.0 | 33.0 |
| TIL 299 | 34.5 | 25.5 | 22.0 | 4.2 | 64.2 | 15.0 | 77.6 | 90.1 | 0.0 | 1.9 | 21.0 | 22.0 |
| TIL 300 | 18.5 | 11.5 | 7.8 | 0.9 | 57.7 | 3.1 | 80.3 | 80.9 | 82.5 | 56.5 | 21.0 | 56.0 |
| TIL 301 | 38.4 | 34.5 | 19.8 | 9.1 | 67.6 | 4.2 | 43.3 | 90.2 | 59.1 | 14.7 | 67.0 | 54.0 |
| TIL 302 | 46.8 | 18.5 | 15.4 | 46.0 | 78.5 | 13.4 | 39.1 | 68.9 | 78.1 |  |  |  |
| TIL 303 | 48.1 | 38.0 | 50.4 | 60.0 | 67.7 | 24.2 | 74.8 | 88.5 | 53.5 | 3.4 | 10.1 | 61.7 |
| TIL 304 | 55.1 | 21.1 | 57.3 | 37.5 | 83.0 | 15.7 | 32.4 | 5.8 | 41.6 | 11.0 | 50.4 | 0.5 |
| TIL 305 | 70.8 | 38.7 | 75.5 | 11.6 | 70.6 | 33.1 | 3.4 | 80.9 | 82.5 |  |  |  |
| TIL 307 | 12.5 | 42.7 | 54.8 | 12.2 | 42.2 | 21.2 | 56.0 | 33.0 | 21.0 | 34.2 | 53.7 | 77.8 |
| TIL 308 | 77.7 | 45.4 | 67.5 | 47.2 | 79.2 | 3.2 | 55.0 | 36.0 | 55.0 | 3.4 | 90.1 | 0.0 |
| TIL 309 | 53.7 | 24.2 | 56.0 | 23.0 | 51.7 | 12.1 | 71.6 | 45.1 | 23.3 | 0.0 | 10.1 | 74.8 |
| TIL 310 | 41.4 | 42.7 | 90.7 | 42.7 | 81.4 | 2.1 |  |  |  | 0.0 | 9.5 | 41.8 |
| TIL 311 | 25.5 | 48.7 | 88.7 | 23.2 | 83.5 | 16.3 | 49.1 | 30.0 | 1.7 | 32.0 | 0.0 | 85.1 |
| TIL 312 | 48.0 | 12.0 | 65.2 | 34.5 | 77.9 | 33.2 | 66.8 | 0.9 | 1.2 | 4.1 | 0.5 | 6.6 |
| TIL 313 | 45.9 | 60.6 | 44.8 | 48.5 | 32.3 | 87.1 | 67.9 | 39.8 | 68.4 | 0.0 | 2.5 | 25.0 |
| TIL 314 | 48.7 | 25.2 | 72.8 | 47.2 | 23.3 | 6.5 | 53.1 | 21.8 | 96.0 | 8.0 | 26.3 | 71.6 |
| TIL 315 | 45.4 | 34.2 | 79.2 | 36.3 | 85.8 | 11.3 | 45.4 | 20.4 | 31.6 | 1.0 | 0.3 | 0.5 |
| TIL 316 | 42.7 | 11.1 | 54.7 | 34.5 | 72.0 | 5.6 | 46.4 | 0.9 | 1.7 |  |  |  |
| TIL 317 | 48.7 | 48.1 | 78.5 | 41.8 | 73.8 | 22.0 | 43.2 | 54.0 | 89.0 | 4.1 | 1.1 | 2.9 |
| TIL 318 | 23.9 | 44.5 | 79.9 | 5.0 | 77.0 | 0.9 |  |  |  | 14.2 | 44.8 | 67.9 |
| TIL 319 | 20.2 | 10.5 | 65.5 | 8.2 | 41.8 | 9.1 |  |  |  | 10.0 | 78.1 | 53.1 |
| TIL 320 | 29.5 | 28.4 | 85.0 | 16.1 | 67.4 | 46.0 | 19.6 | 39.1 | 68.1 | 11.1 | 23.0 | 35.0 |
| TIL 321 | 22.8 | 48.7 | 80.2 | 23.3 | 78.0 | 36.3 |  |  |  | 8.0 | 3.1 | 1.4 |
| TIL 322 | 38.3 | 23.9 | 70.0 | 26.3 | 41.5 | 24.5 | 69.3 | 56.3 | 77.1 | 4.1 | 1.1 | 2.9 |
| TIL 323 | 29.8 | 20.0 | 56.1 | 13.5 | 72.9 | 11.8 |  |  |  | 7.0 | 34.8 | 35.2 |
| TIL 324 | 23.6 | 33.6 | 64.4 | 11.2 | 72.7 | 5.0 | 63.2 | 21.2 | 80.1 | 14.2 | 0.3 | 0.1 |
| TIL 325 | 11.3 | 21.5 | 56.0 | 18.8 | 41.7 | 4.3 | 33.2 | 45.1 | 66.5 | 7.0 | 34.0 | 25.0 |
| TIL 326 | 16.7 | 32.0 | 41.7 | 8.8 | 41.2 | 8.2 | 76.1 | 30.2 | 76.2 | 10.0 | 10.0 | 40.0 |
| TIL 327 | 8.1 | 17.6 | 62.9 | 10.5 | 69.3 | 14.2 | 50.1 | 67.1 | 38.9 | 11.1 | 0.0 | 0.0 |
| TIL 328 | 17.3 | 8.7 | 72.2 | 22.5 | 65.3 | 30.2 | 23.1 | 67.5 | 22.5 | 7.0 | 4.2 | 1.3 |
| TIL 330 | 44.8 | 28.5 | 55.4 | 36.0 | 68.4 | 13.4 | 73.7 | 46.2 | 1.2 | 39.0 | 2.4 | 5.4 |
| TIL 331 | 58.2 | 28.3 | 40.4 | 42.1 | 57.7 | 23.2 | 43.3 | 90.2 | 59.1 | 8.4 | 7.4 | 29.5 |
| TIL 333 | 45.8 | 31.3 | 58.3 | 57.5 | 73.5 | 29.6 | 43.3 | 90.2 | 59.1 | 3.4 | 61.7 | 10.1 |
| TIL 334 | 60.6 | 58.5 | 35.9 | 51.6 | 36.6 | 75.5 | 77.6 | 90.1 | 70.0 | 11.0 | 50.4 | 0.5 |
| TIL 335 | 52.5 | 32.7 | 74.8 | 22.2 | 52.5 | 31.2 | 77.3 | 3.6 | 11.8 | 3.4 | 4.2 | 12.0 |
| TIL 336 | 57.7 | 65.5 | 63.5 | 77.2 | 69.2 | 33.3 |  |  |  | 22.6 | 9.3 | 46.5 |
| TIL 337 | 43.7 | 44.2 | 74.3 | 55.2 | 11.2 | 64.2 | 32.6 | 4.6 | 53.2 | 20.3 | 19.5 | 41.8 |
| TIL 338 | 21.4 | 32.3 | 60.8 | 42.8 | 21.6 | 25.1 | 86.5 | 76.5 | 87.1 | 53.5 | 25.8 | 40.6 |
| TIL 339 | 15.5 | 58.7 | 48.7 | 33.7 | 53.6 | 26.1 | 45.1 | 87.4 | 66.4 |  |  |  |
| TIL 340 | 38.0 | 52.7 | 85.7 | 36.6 | 67.9 | 23.8 | 78.0 | 86.9 | 62.6 | 65.2 | 9.7 | 47.5 |
| TIL 341 | 48.4 | 42.5 | 66.7 | 50.2 | 22.7 | 56.9 | 49.9 | 56.7 | 43.8 | 51.6 | 22.9 | 69.9 |
| TIL 342 | NP | NP | NP | NP | NP | NP | 79.2 | 86.9 | 60.0 | 65.4 | 44.5 | 0.6 |
| TIL 343 | NP | NP | NP | NP | NP | NP | 73.7 | 10.5 | 9.3 | 45.4 | 5.4 | 15.8 |
| TIL 344 | NP | NP | NP | NP | NP | NP | 32.4 | 5.8 | 41.6 |  |  |  |
| TIL 346 | NP | NP | NP | NP | NP | NP | 84.2 | 89.7 | 11.8 |  |  |  |
| TIL 348 | NP | NP | NP | NP | NP | NP | 66.8 | 0.9 | 1.2 |  |  |  |
| TIL 349 | NP | NP | NP | NP | NP | NP | 18.5 | 1.6 | 2.7 |  |  |  |
| TIL 350 | NP | NP | NP | NP | NP | NP | 46.4 | 0.9 | 1.7 | 8.0 | 1.1 | 1.4 |
| TIL 351 | NP | NP | NP | NP | NP | NP | 30.1 | 11.7 | 35.2 | 6.5 | 1.1 | 0.6 |
| TIL 352 | NP | NP | NP | NP | NP | NP | 71.2 | 32.1 | 42.6 | 7.0 | 34.8 | 35.2 |
| TIL 353 | NP | NP | NP | NP | NP | NP | 85.0 | 89.2 | 15.1 |  |  |  |
| TIL 354 | NP | NP | NP | NP | NP | NP | 34.3 | 99.1 | 94.5 | 1.0 | 13.8 | 26.8 |
| TIL 356 | NP | NP | NP | NP | NP | NP |  |  |  | 66.4 | 32.2 | 40.7 |
| TIL 358 | NP | NP | NP | NP | NP | NP |  |  |  | 39.5 | 34.1 | 22.3 |
| TIL 359 | NP | NP | NP | NP | NP | NP | 33.2 | 38.1 | 65.0 | 42.3 | 3.1 | 14.6 |
| TIL 360 | NP | NP | NP | NP | NP | NP | 14.9 | 0.2 | 4.8 |  |  |  |
| TIL 361 | NP | NP | NP | NP | NP | NP | 85.1 | 0.6 | 0.1 |  |  |  |
| TIL 362 | NP | NP | NP | NP | NP | NP | 73.0 | 38.0 | 0.4 | 7.0 | 4.2 | 1.3 |
| TIL 363 | NP | NP | NP | NP | NP | NP | 77.9 | 25.2 | 4.7 | 1.2 | 13.6 | 9.9 |
| TIL 364 | NP | NP | NP | NP | NP | NP | 6.6 | 5.4 | 3.9 | 0.6 | 0.5 | 0.5 |
| TIL 365 | NP | NP | NP | NP | NP | NP |  |  |  | 1.9 | 2.5 | 1.6 |
| TIL 366 | NP | NP | NP | NP | NP | NP | 67.0 | 1.2 | 3.8 |  |  |  |
| TIL 367 | NP | NP | NP | NP | NP | NP | 74.8 | 88.5 | 53.5 | 15.6 | 0.1 | 8.2 |
| TIL 368 | NP | NP | NP | NP | NP | NP | 64.1 | 7.6 | 2.1 | 14.7 | 7.0 | 15.8 |
| TIL 369 | NP | NP | NP | NP | NP | NP | 71.6 | 45.1 | 23.3 | 48.5 | 26.3 | 24.7 |
| TIL 370 | NP | NP | NP | NP | NP | NP | 0.5 | 0.5 | 83.2 | 2.9 | 0.3 | 89.6 |
| TIL 371 | NP | NP | NP | NP | NP | NP | 81.3 | 40.9 | 22.5 |  |  |  |
| TIL 372 | NP | NP | NP | NP | NP | NP | 33.8 | 50.2 | 79.1 |  |  |  |
| TIL 373 | NP | NP | NP | NP | NP | NP | 2.5 | 0.8 | 0.1 | 37.1 | 8.5 | 0.3 |
| TIL 374 | NP | NP | NP | NP | NP | NP | 0.9 | 0.7 | 23.2 | 15.3 | 0.7 | 4.1 |
| TIL 377 | NP | NP | NP | NP | NP | NP |  |  |  | 0.2 | 0.3 | 0.4 |
| TIL 378 | NP | NP | NP | NP | NP | NP | 15.9 | 1.2 | 6.8 | 0.6 | 5.4 | 2.9 |
| TIL 379 | NP | NP | NP | NP | NP | NP | 68.7 | 25.7 | 2.9 | 2.7 | 5.2 | 32.1 |
| TIL 381 | NP | NP | NP | NP | NP | NP | 40.1 | 48.6 | 7.9 | 0.8 | 26.0 | 13.1 |
| TIL 382 | NP | NP | NP | NP | NP | NP |  |  |  | 3.3 | 10.9 | 5.3 |
| TIL 383 | NP | NP | NP | NP | NP | NP | 18.7 | 7.9 | 8.4 | 1.9 | 14.0 | 54.0 |
| TIL 384 | NP | NP | NP | NP | NP | NP |  |  |  | 1.5 | 17.1 | 38.3 |
| TIL 385 | NP | NP | NP | NP | NP | NP | 38.9 | 27.2 | 10.7 | 0.6 | 13.2 | 71.0 |
| TIL 386 | NP | NP | NP | NP | NP | NP | 36.4 | 28.0 | 22.6 |  |  |  |
| TIL 388 | NP | NP | NP | NP | NP | NP | 14.1 | 25.8 | 8.0 | 3.1 | 6.1 | 2.4 |
| TIL 389 | NP | NP | NP | NP | NP | NP | 26.1 | 3.9 | 40.9 | 3.1 | 23.8 | 21.7 |
| TIL 390 | NP | NP | NP | NP | NP | NP | 4.7 | 0.4 | 0.4 | 0.2 | 5.9 | 0.3 |
| TIL 391 | NP | NP | NP | NP | NP | NP |  |  |  | 12.2 | 3.8 | 11.7 |
| TIL 392 | NP | NP | NP | NP | NP | NP | 16.3 | 37.2 | 25.3 | 1.5 | 8.5 | 2.8 |
| TIL 393 | NP | NP | NP | NP | NP | NP | 5.1 | 1.1 | 0.9 | 0.2 | 0.3 | 0.2 |
| TIL 399 | NP | NP | NP | NP | NP | NP | 8.8 | 49.1 | 4.1 | 1.4 | 3.4 | 1.5 |
| TIL 402 | NP | NP | NP | NP | NP | NP | 44.2 | 32.8 | 86.6 | 18.9 | 16.8 | 54.1 |
| TIL 403 | NP | NP | NP | NP | NP | NP | 10.6 | 43.9 | 6.0 | 0.5 | 5.7 | 1.6 |
| TIL 404 | NP | NP | NP | NP | NP | NP | 76.1 | 47.2 | 15.3 | 7.0 | 8.8 | 9.1 |
| TIL 405 | NP | NP | NP | NP | NP | NP | 53.6 | 90.0 | 6.4 | 10.8 | 63.1 | 2.8 |
| TIL 406 | NP | NP | NP | NP | NP | NP | 12.8 | 56.3 | 2.6 | 65.1 | 87.1 | 11.1 |
| TIL 407 | NP | NP | NP | NP | NP | NP | 62.7 | 92.1 | 13.1 | 15.3 | 69.1 | 6.9 |
| TIL 412 | NP | NP | NP | NP | NP | NP | 13.2 | 22.1 | 25.0 | 36.2 | 22.1 | 43.3 |
| TIL 413 | NP | NP | NP | NP | NP | NP |  |  |  | 11.0 | 32.4 | 20.5 |
| TIL 414 | NP | NP | NP | NP | NP | NP | 22.4 | 15.8 | 30.6 | 10.3 | 24.3 | 10.7 |
| TIL 415 | NP | NP | NP | NP | NP | NP | 28.8 | 29.9 | 43.2 | 3.6 | 23.1 | 23.4 |
| TIL 416 | NP | NP | NP | NP | NP | NP | 23.5 | 72.5 | 38.5 | 2.1 | 92.2 | 20.1 |
| TIL 417 | NP | NP | NP | NP | NP | NP | 2.9 | 9.3 | 42.9 | 2.4 | 21.2 | 17.5 |
| TIL 418 | NP | NP | NP | NP | NP | NP | 25.1 | 20.6 | 12.1 | 8.1 | 3.3 | 5.2 |
| TIL 419 | NP | NP | NP | NP | NP | NP | 32.4 | 35.1 | 20.6 | 28.9 | 6.4 | 26.4 |
| TIL 420 | NP | NP | NP | NP | NP | NP | 61.0 | 36.0 | 66.9 | 7.8 | 63.4 | 35.2 |
| TIL 421 | NP | NP | NP | NP | NP | NP | 46.2 | 67.2 | 32.5 | 3.2 | 9.3 | 11.4 |
| TIL 422 | NP | NP | NP | NP | NP | NP | 21.5 | 5.8 | 36.9 | 3.5 | 6.0 | 12.1 |
| TIL 423 | NP | NP | NP | NP | NP | NP | 36.0 | 80.2 | 45.1 | 0.6 | 5.4 | 2.9 |
| TIL 424 | NP | NP | NP | NP | NP | NP | 55.1 | 0.6 | 20.1 | 3.7 | 5.2 | 32.1 |
| TIL 426 | NP | NP | NP | NP | NP | NP | 21.2 | 52.6 | 36.5 | 2.7 | 8.3 | 10.2 |
| TIL 427 | NP | NP | NP | NP | NP | NP | 16.1 | 30.0 | 33.4 | 5.1 | 12.3 | 2.5 |
| TIL 428 | NP | NP | NP | NP | NP | NP | 8.1 | 23.3 | 27.2 | 6.2 | 2.1 | 13.3 |
| TIL 429 | NP | NP | NP | NP | NP | NP | 2.8 | 10.1 | 0.0 | 0.0 | 0.7 | 0.0 |
| TIL 430 | NP | NP | NP | NP | NP | NP | 2.6 | 3.4 | 0.2 |  |  |  |
| TIL 431 | NP | NP | NP | NP | NP | NP | 26.1 | 50.0 | 37.3 | 0.7 | 32.0 | 11.4 |
| TIL 432 | NP | NP | NP | NP | NP | NP | 15.8 | 56.4 | 13.0 | 0.0 | 29.3 | 1.2 |
| TIL 435 | NP | NP | NP | NP | NP | NP | 5.1 | 56.4 | 13.0 | 0.0 | 29.3 | 1.2 |
| TIL 436 | NP | NP | NP | NP | NP | NP | 21.3 | 42.7 | 11.6 | 0.5 | 9.0 | 2.1 |

pre-enrichment (gated on CD137+); end of culture: day 18 for expanded, day 14 for not expanded tr-TILs. In red not expanded tr-TILs. In blue tr-TIL samples subjected to in vitro functional molecular characterization. Highlighted light blue IDH1 mutant samples.

**Table S6. Recovery of the GMP grade CD137-selection process**

CliniMACS, commonly used for the separation of cell populations for clinical use, was developed for the isolation of large quantities of cells within a lymphocyte-apheresis (up to 40×10^9), while its use is not recommended for the separation of small quantities of cells (< 2x10^8). On the contrary, the initial number of IP cells derived from CUSA was always less than 10x10^6, with the only exception of sample TIL 242 that indeed was properly enriched.

| ID | Isolated immune cells  (x10^6) | CD137-enriched cells  (x10^5) | CD137+ cells  (%) | |
| --- | --- | --- | --- | --- |
| Positive fraction | Negative fraction |
| TIL241 | 3.1 | 13.0 | 29.0 | 42.0 |
| TIL 242 | 25.0 | 39.6 | 80.0 | 37.1 |
| TIL 248 | 5.4 | 8.0 | 50.0 | 37.6 |
| TIL 249 | 12.0 | 0.3 | 30.0 | 36.1 |
| TIL 250 | 9.4 | 1.3 | <10.0 | 39.1 |
| TIL 251 | 7.5 | 5.4 | <10.0 | 47.3 |

**Table S7. TIL yield after second expansion (REP)**

| **ID** | **1st expansion** | | | **2nd expansion** | | |
| --- | --- | --- | --- | --- | --- | --- |
| **Cell number** (x10^6) | | **Fold expansion** | **Cell number** (x10^6) | | **Fold expansion** |
| **Day 0** | **Day 18** | **Day 19** | **Day 34** |
| *Releasable samples* | | | | | | |
| TIL 287 | 0.15 | 34.0 | 228 | 1.0 | 320.0 | 320 |
| TIL 319 | 0.05 | 95.0 | 1900 | 1.0 | 250.2 | 250 |
| TIL 343 | 0.05 | 170.0 | 3400 | 0.8 | 288.0 | 360 |
| TIL 354 | 0.05 | 17.0 | 331 | 1.0 | 152.0 | 152 |
| TIL 302 | 0.05 | 6.3 | 123 | 0.4 | 20.3 | 57 |
| TIL 356 | 0.1 | 105 | 1050 | 1.0 | 254 | 254 |
| TIL 359 | 0.1 | 74 | 740 | 1.0 | 390 | 390 |
| *Not-releasable samples* | | | | | | |
| TIL 309 | 0.05 | 0.8 | 15.6 | 0.4 | < 1.0 | NE |
| TIL 310 | 0.05 | 3.8 | 75.6* | 0.4 | 98.0 | 245* |
| TIL 317 | 0.1 | 0.7 | 7 | 0.4 | < 1.0 | NE |
| TIL 370 | 0.05 | 1.6 | 32* | 0.4 | 89.0 | 222* |
| TIL 281 | 0.05 | 1.0 | 20* | 0.5 | 50.6 | 101.2* |
| TIL 314 | 0.05 | 1.1 | 22* | 0.5 | 125.0 | 250* |
| TIL 353 | 0.05 | 0.9 | 18 | 0.5 | < 1.0 | NE |
| TIL 374 | 0.05 | 1.0 | 20* | 0.5 | 74.0 | 148* |

tr-TILs in the table were subjected to a second expansion.

Two different behaviours were observed.

*Releasable samples*: tr-TILs expanded after the first expansion (18 days), in a sufficient number for clinical use, showed a high proliferation rate in second expansion (14 days).

*Not-releasable samples*: tr-TILs not-expanded, but with a fold expansion ≥20, showed an exponential proliferation during the second expansion (5/8). The other samples did not expand.

Highlighted yellow TILs subjected to TCR seq.
